# Supplementary material for: Treatment effects of systematic two-stent and provisional stenting techniques in patients with complex coronary bifurcation lesions: rationale and design of a prospective, randomised and multicentre DEFINITION II trial
Source: PubMed Central journal article supplement — BMJ Open. 2018 Mar 6;8(3):e020019. doi: 10.1136/bmjopen-2017-020019 (PMC5855162; doi:10.1136/bmjopen-2017-020019), 2018-03-06
Supplement: bmjopen-2017-020019.draft_revisions.pdf [file bmjopen-2017-020019.draft_revisions.pdf]

# BMJ Open

BMJ Open is committed to open peer review. As part of this commitment we make the peer review history of every article we publish publicly available.

When an article is published we post the peer reviewers' comments and the authors' responses online. We also post the versions of the paper that were used during peer review. These are the versions that the peer review comments apply to.

The versions of the paper that follow are the versions that were submitted during the peer review process. They are not the versions of record or the final published versions. They should not be cited or distributed as the published version of this manuscript.

BMJ Open is an open access journal and the full, final, typeset and author-corrected version of record of the manuscript is available on our site with no access controls, subscription charges or pay-per-view fees (<http://bmjopen.bmj.com>).

If you have any questions on BMJ Open's open peer review process please email [editorial.bmjopen@bmj.com](mailto:editorial.bmjopen@bmj.com)

# BMJ Open

## Rationale and design for the treatment effects of systematic two-stent and provisional stenting techniques in patients with complex coronary bifurcation lesions (DEFINITION II Trial)

|                               |                                                                                                                                                                                                                                                                                                                                                                                                                                                                                                                                                                                                                                                                                                                                                                                                                                                                                                                                                                                                                                                                                                                                                                                                                                                                                                                                                                                                                                                                                                                                                                                                                                                                                                                                                                                                                                                                                                                                                                                                                                                                                                                                                                                                                                                                                                                                                                                                      |
|-------------------------------|------------------------------------------------------------------------------------------------------------------------------------------------------------------------------------------------------------------------------------------------------------------------------------------------------------------------------------------------------------------------------------------------------------------------------------------------------------------------------------------------------------------------------------------------------------------------------------------------------------------------------------------------------------------------------------------------------------------------------------------------------------------------------------------------------------------------------------------------------------------------------------------------------------------------------------------------------------------------------------------------------------------------------------------------------------------------------------------------------------------------------------------------------------------------------------------------------------------------------------------------------------------------------------------------------------------------------------------------------------------------------------------------------------------------------------------------------------------------------------------------------------------------------------------------------------------------------------------------------------------------------------------------------------------------------------------------------------------------------------------------------------------------------------------------------------------------------------------------------------------------------------------------------------------------------------------------------------------------------------------------------------------------------------------------------------------------------------------------------------------------------------------------------------------------------------------------------------------------------------------------------------------------------------------------------------------------------------------------------------------------------------------------------|
| Journal:                      | <i>BMJ Open</i>                                                                                                                                                                                                                                                                                                                                                                                                                                                                                                                                                                                                                                                                                                                                                                                                                                                                                                                                                                                                                                                                                                                                                                                                                                                                                                                                                                                                                                                                                                                                                                                                                                                                                                                                                                                                                                                                                                                                                                                                                                                                                                                                                                                                                                                                                                                                                                                      |
| Manuscript ID                 | bmjopen-2017-020019                                                                                                                                                                                                                                                                                                                                                                                                                                                                                                                                                                                                                                                                                                                                                                                                                                                                                                                                                                                                                                                                                                                                                                                                                                                                                                                                                                                                                                                                                                                                                                                                                                                                                                                                                                                                                                                                                                                                                                                                                                                                                                                                                                                                                                                                                                                                                                                  |
| Article Type:                 | Protocol                                                                                                                                                                                                                                                                                                                                                                                                                                                                                                                                                                                                                                                                                                                                                                                                                                                                                                                                                                                                                                                                                                                                                                                                                                                                                                                                                                                                                                                                                                                                                                                                                                                                                                                                                                                                                                                                                                                                                                                                                                                                                                                                                                                                                                                                                                                                                                                             |
| Date Submitted by the Author: | 10-Oct-2017                                                                                                                                                                                                                                                                                                                                                                                                                                                                                                                                                                                                                                                                                                                                                                                                                                                                                                                                                                                                                                                                                                                                                                                                                                                                                                                                                                                                                                                                                                                                                                                                                                                                                                                                                                                                                                                                                                                                                                                                                                                                                                                                                                                                                                                                                                                                                                                          |
| Complete List of Authors:     | <p>Zhang, Junjie; Nanjing First Hospital, Department of Cardiology<br/> Gao, Xiaofei; Nanjing First Hospital, Department of Cardiology<br/> Han, YL; The General Hospital of Shenyang Military, Department of Cardiology<br/> Kan, Jing; Nanjing Heart Center, Department of Cardiology<br/> Tao, Ling; Xijing Hospital, 4th Military Medical University, Department of Cardiology<br/> Ge, Zhen; Nanjing First Hospital, Department of Cardiology<br/> Tresukosol, Damras; Medicine Siriraj Hospital, Mahidol University, cardiology<br/> Lu, Shu; Taicang People's Hospital, Department of Cardiology<br/> Ma, Likun; Anhui Provincial Hospital, Department of Cardiology<br/> Li, Feng; Huainan Eastern Hospital, Department of Cardiology<br/> Yang, Song; Yixin People's Hospital, Department of Cardiology<br/> Zhang, Jun; Cangzhou Central Hospital, Department of Cardiology<br/> Munawar, Muhammad; Binawaluya Cardiac Center, Department of Cardiology<br/> Li, Li; Guangzhou Red Cross Hospital, Department of Cardiology<br/> Zhang, Ruiyan; Shanghai Ruijin Hospital, Department of Cardiology<br/> Zeng, Hesong; Tongji Hospital, Tongji Medical College, Huazhong University of Science and Technology, Department of Cardiology<br/> Santoso, Teguh; Medistra Hospital, University of Indonesia, cardiology<br/> Xie, Ping; Gansu Provincial Hospital, Department of Cardiology<br/> Jin, Zening; Beijing Anzhen Hospital, Department of Cardiology<br/> Han, Leng; Changshu First People's Hospital, Department of Cardiology<br/> Yin, Wei-Hsian; Cheng-Hsin General Hospital, cardiology<br/> Qian, Xuesong; Zhangjiagang First People's Hospital, Department of Cardiology<br/> Li, Qihua; Changzhou Hospital of Traditional Chinese Medicine, Department of Cardiology<br/> Hong, Lang; Jiangxi Provincial People's Hospital, Department of Cardiology<br/> Paiboon, Chotnoparatpat; Bangkok General Hospital, cardiology<br/> Wang, Yan; Xia'Men Zhongshan Hospital, cardiology<br/> Liu, Lijun; Huainan First People's Hospital, Department of Cardiology<br/> Zhou, Lei; Jintan People's Hospital, cardiology<br/> Wu, Xueming; Wuxi Third People 's Hospital, cardiology<br/> Wen, Shangyu; Daqing Oil General Hospital, cardiology<br/> Lu, Qinghua; The Second Hospital of Shandong University, cardiology<br/> Yuan, Junqiang; Xinyang Central Hospital, cardiology</p> |

|           |                                                                                                                                                                                                                                                                                                                                                                                                                                                                                                                                                                                                                                                                                                                                                                                                                                                                                                                                                                                                                                                                                                                                                                                                                                                                                                                                                                                                                                                                                     |
|-----------|-------------------------------------------------------------------------------------------------------------------------------------------------------------------------------------------------------------------------------------------------------------------------------------------------------------------------------------------------------------------------------------------------------------------------------------------------------------------------------------------------------------------------------------------------------------------------------------------------------------------------------------------------------------------------------------------------------------------------------------------------------------------------------------------------------------------------------------------------------------------------------------------------------------------------------------------------------------------------------------------------------------------------------------------------------------------------------------------------------------------------------------------------------------------------------------------------------------------------------------------------------------------------------------------------------------------------------------------------------------------------------------------------------------------------------------------------------------------------------------|
|           | <p>Chen, Lianglong; Fujian Union Hospital, cardiology<br/> Lavarra, Francesco; Jilin Heart Hospital, cardiology<br/> Rodríguez, Alfredo E. ; Otamendi Hospital, cardiology<br/> Zhou, Limin; Chuzhou First People 's Hospital, cardiology<br/> Ding, Shiqin; Huainan Xinhua Hospital, cardiology<br/> Vichairuangthum, Kitigon; Bangplee Hospital, cardiology<br/> Zhu, Yuansheng; Huai'an Second People's Hospital, cardiology<br/> Yu, Mengyue; Qingdao Fuwai Hospital, cardiology<br/> Chen, Chan; The Affiliated Hospital of Guangdong Medical University,<br/> cardiology<br/> Sheiban, Imad; Pederzoli Hospital, cardiology<br/> Xia, Yong; The Affiliated Hospital of Xuzhou Medical University, cardiology<br/> Tian, Yulong; Xuyi People's Hospital, cardiology<br/> Shang, Zhenglu ; Wuxi Huishan District People's Hospital, cardiology<br/> Jiang, Qing; Anqing First People's Hospital, cardiology<br/> Zhen, Yonghong; Liyang Hospital of Traditional Chinese Medicine,<br/> cardiology<br/> Wang, Xin; Lianyungang Hospital of Traditional Chinese Medicine,<br/> cardiology<br/> Ye, Fei; Nanjing First Hospital, Department of Cardiology<br/> Tian, Nailiang; Nanjing First Hospital, Department of Cardiology<br/> Lin, Song; Nanjing First Hospital, Department of Cardiology<br/> Liu, Zhizhong; Nanjing First Hospital, Department of Cardiology<br/> Chen, Shao-Liang; Nanjing First Hospital, Nanjing Medical University,<br/> Department of Cardiology</p> |
| Keywords: | coronary bifurcation lesions, systematic two-stent techniques, provisional stenting technique                                                                                                                                                                                                                                                                                                                                                                                                                                                                                                                                                                                                                                                                                                                                                                                                                                                                                                                                                                                                                                                                                                                                                                                                                                                                                                                                                                                       |

SCHOLARONE™  
Manuscripts

1  
2  
3 **Rationale and design for the treatment effects of systematic two-stent and provisional**  
4 **stenting techniques in patients with complex coronary bifurcation lesions**  
5

6 **(DEFINITION II Trial)**  
7

8 Jun-Jie Zhang,<sup>1</sup> Xiao-Fei Gao,<sup>1</sup> Ya-Ling Han,<sup>2</sup> Jing Kan,<sup>3</sup> Ling Tao,<sup>4</sup> Zhen Ge,<sup>1</sup> Damras  
9 Tresukosol,<sup>5</sup> Shu Lu,<sup>6</sup> Li-Kun Ma,<sup>7</sup> Feng Li,<sup>8</sup> Song Yang,<sup>9</sup> Jun Zhang,<sup>10</sup> Muhammad Munawar,<sup>11</sup>  
10 Li Li,<sup>12</sup> Rui-Yan Zhang,<sup>13</sup> He-Song Zeng,<sup>14</sup> Teguh Santoso,<sup>15</sup> Ping Xie,<sup>16</sup> Ze-Ning Jin,<sup>17</sup> Leng  
11 Han,<sup>18</sup> Wei-Hsian Yin,<sup>19</sup> Xue-Song Qian,<sup>20</sup> Qi-Hua Li,<sup>21</sup> Lang Hong,<sup>22</sup> Chotnoparatpat  
12 Paiboon,<sup>23</sup> Yan Wang,<sup>24</sup> Li-Jun Liu,<sup>25</sup> Lei Zhou,<sup>26</sup> Xue-Ming Wu,<sup>27</sup> Shang-Yu Wen,<sup>28</sup> Qing-Hua  
13 Lu,<sup>29</sup> Jun-Qiang Yuan,<sup>30</sup> Liang-Long Chen,<sup>31</sup> Francesco Lavarra,<sup>32</sup> Alfredo E. Rodríguez,<sup>33</sup>  
14 Li-Min Zhou,<sup>34</sup> Shi-Qin Ding,<sup>35</sup> Kitigon Vichairuangthum,<sup>36</sup> Yuan-Sheng Zhu,<sup>37</sup> Meng-Yue Yu,<sup>38</sup>  
15 Chan Chen,<sup>39</sup> Imad Sheiban,<sup>40</sup> Yong Xia,<sup>41</sup> Yu-Long Tian,<sup>42</sup> Zheng-Lu Shang,<sup>43</sup> Qing Jiang,<sup>44</sup>  
16 Yong-Hong Zhen,<sup>45</sup> Xin Wang,<sup>46</sup> Fei Ye,<sup>1</sup> Nai-Liang Tian,<sup>1</sup> Song Lin,<sup>1</sup> Zhi-Zhong Liu,<sup>1</sup>  
17 Shao-Liang Chen,<sup>1,3\*</sup>  
18  
19  
20

21  
22 Zhang JJ and Gao XF contributed equally to this work.  
23  
24

25 **\*Correspondence author:** Department of cardiology, Nanjing First Hospital, Nanjing  
26 Medical University; No. 68 Changle road, 210006 Nanjing, China; Tel & Fax:  
27 +86-25-52208048; E-mail: [chmengx@126.com](mailto:chmengx@126.com).  
28  
29  
30  
31  
32  
33  
34  
35  
36  
37  
38  
39  
40  
41  
42  
43  
44  
45  
46  
47  
48  
49  
50  
51  
52  
53  
54  
55  
56  
57  
58  
59  
60

## Abstract

**Introduction:** Provisional stenting (PS) for simple coronary bifurcation lesions is the mainstay of treatment. Systematic two-stent approach is widely used for complex bifurcation lesions (CBLs). However, randomized comparison of PS and two-stent techniques for CBLs has never been studied. Accordingly, the present study is designed to elucidate the benefits of two-stent treatment over PS in patients with CBLs.

**Methods and analysis:** The DEFINITION II study is a prospective, multinational, randomized, endpoint-driven trial to compare the benefits of two-stent technique with PS for CBLs. A total of 660 patients with CBLs will be randomized in a 1:1 fashion to receive either PS or two-stent technique. The primary endpoint is the rate of 12-month target lesion failure (TLF) defined as the composite of cardiac death, target vessel myocardial infarction (MI), and target lesion revascularization (TLR). The major secondary endpoints include all cause death, MI, target vessel revascularization (TVR), in-stent restenosis, stroke, and each individual component of the primary endpoint. The safety endpoint is the occurrence of definite or probable stent thrombosis (ST).

**Ethics and dissemination:** The study protocol and informed consent have been reviewed and approved by the Institutional Review Board at each participating center. The written informed consent was obtained from all enrolled patients. Findings of the study will be published in a peer-reviewed journal, and disseminated at conferences.

**Trial registration number:** NCT02284750; Pre-results.

### Strengths and limitations of this study

- This is the first prospective, multinational, randomized, endpoint-driven trial to compare the systematic two-stent and provisional stenting (PS) techniques in patients with complex coronary bifurcation lesions (CBLs).
- This study is built on DEFINITION registry, which for the first time introduced the anatomical differentiation of coronary bifurcation lesion's complexity, and reported that PS for CBLs was associated with an increment of major adverse cardiac events as compared with simple bifurcation lesions.
- Selection of primary and secondary endpoints is in accordance with the current practice in other cardiovascular clinical trials.
- All participating sites are experienced in two-stent techniques (including DK crush and culotte), which may not be reflective of clinical practice in smaller hospitals.

## Background

Percutaneous coronary intervention (PCI) of bifurcation lesions is technically demanding and poor outcome at follow-up, as reflected by more frequent in-stent restenosis (most localize at the ostium of daughter branch) and more requirements of revascularization. For a great majority of coronary bifurcation lesions, particularly when a small (diameter<2.0mm) side branch (SB) with focal (usually <5 mm in length) lesions is involved, provisional stenting (PS) is considered as the default approach<sup>1-6</sup>. However, the efficacy of PS for larger ( $\geq 2.5$  mm in diameter) SB with longer lesion (>5mm in length) is under reported<sup>7,8</sup>. Furthermore, there is a lack of angiographical criteria for differentiating simple from complex bifurcation lesions (CBLs). In this regard, DEFINITION registry study<sup>9</sup> for the first time introduced the anatomical differentiation of bifurcation lesion's complexity, which consisted of 2 major and 6 minor criteria. Based on DEFINITION criteria, CBLs was defined as one major plus any two minor criteria. Investigators further reported that PS for CBLs was associated with an increment of mortality, ST, and major adverse cardiac events (MACE) and stent thrombosis as compared with simple bifurcation lesions. Unfortunately, PS has not been compared with systematic two-stent techniques in a randomized fashion for patients with CBLs. Therefore, we designed this prospective, multi-center, randomized (DEFINITION II) study to investigate the superiority of systematic two-stent approaches to PS treatment for patients with CBLs classified by DEFINITION registry.

## Study design and methods

### Study hypothesis

This study is designed to test the hypothesis that the application of systematic two-stent techniques will lead to fewer rate of target lesion failure (TLF), including cardiac death, target-vessel myocardial infarction (MI), or target lesion revascularization (TLR), compared to PS technique in patients with CBLs at 12 months after the indexed PCI procedure. CBLs are defined according to DEFINITION study<sup>9</sup>, and the criteria are shown in [Table 1](#).

## Study design

This is a prospective, multi-center, randomized-controlled, superiority trial at up to 45 sites worldwide to enroll 660 subjects with CBLs in native coronary artery. The overall study flowchart is presented in [Figure 1](#). This study has been registered at [clinicaltrials.gov](http://clinicaltrials.gov) (NCT02284750), according to the statement of the International Committee of Medical Journal Editors. The study is performed in accordance with the Declaration of Helsinki and International Conference on Harmonization of Good Clinical Practices. The study protocol and informed consent have been reviewed and approved by the Institutional Review Board at each participating center. The written informed consent for participation in the trial was obtained from all enrolled patients.

## Study population and randomization

A number of 660 patients scheduled for elective PCI with CBLs suitable for DES implantation are openly randomized 1:1 to either systematic two-stent or PS technique. The detailed inclusion and exclusion criteria for the present study are listed in [Table 2](#). The planned enrollment duration is between December 2015 and December 2018, and the enrollment period may be extended if necessary. There were 446 patients enrolled until September 2017.

The randomization serial number for patients will be performed by Interactive Web Randomization System (IWRS). The randomization serial number for each participating center will be undergone by the same system.

## Study intervention and medication

Patients allocated to the two-stent group will receive double kissing (DK) crush, or culotte technique.

**DK crush technique.** DK crush stenting technique has been described in details elsewhere<sup>7,10-12</sup>. Briefly, a stent with stent/artery ratio of 1.1:1 is advanced into side branch (SB). Another balloon with balloon/artery ratio of 1:1 is positioned in main vessel (MV). Inflating



1  
2  
3 SB stent with 2-3mm protrusion into MV, and then the stent balloon and SB wire are  
4 removed after confirming that there was no dissection in distal SB by angiogram. Inflating  
5 previous balloon in MV performs first crush. First kissing balloon inflation is performed  
6  
7 after rewiring SB from the proximal stent cell. MV stent with stent/artery ratio of 1.1:1 is  
8  
9 inflated and crushed SB stent again, which then followed by rewiring SB and final kissing  
10  
11 balloon inflation (FKBI). Proximal optimization technique (POT) is recommended to  
12  
13 perform before and after FKBI. Post dilatation with non-complaint balloon is recommended  
14  
15 for all stent, with suggested inflation pressure > 18 atm.  
16

17  
18 **Culotte technique.** Culotte stenting has been described in details elsewhere<sup>13</sup>.  
19

20 **Provisional stenting technique.** PS was defined as a stent implantation in the main vessel  
21 with the jailed wire or jailed balloon protecting SB<sup>14,15</sup>, followed by kissing balloon  
22 dilatation if there was at least one of following: >type B dissection and TIMI flow < 3 at the  
23 ostial side branch<sup>5</sup>. An additional stent was required for the side branch if any of the  
24 following issues was observed after kissing balloon inflation: > type B dissection or  
25 thrombolysis in myocardial infarction (TIMI) flow < 3. POT is also recommended after MV  
26 stenting.  
27

28 **Intracoronary imaging.** Intracoronary imaging tools such as intravascular ultrasound  
29 (IVUS), or optical coherence tomography (OCT) are at the discretion of the operators.  
30

31 **Study stents.** Stents for all implanted lesions are drug-eluting stents (DESs), including  
32 Firebird-2, or Firehawk (Microport Co., Shanghai, China); EXCEL (Jiwei Co., Shandong,  
33 China); BuMA stent (Sino Medical, Tianjin, China); Partner or Nano (Lepu Med, Beijing,  
34 China); Xience or Xience Prime (Abbott Vascular, Santa Clara, California); and Endeavor  
35 Resolute or Endeavor Integrity (Medtronic, Minneapolis, Minnesota).  
36

37 **Medication.** All patients in the trial are treated with dual antiplatelet therapy for at least  
38 one year according to contemporary guidelines and local practice. A loading dose of aspirin  
39 (300mg) and clopidogrel (300mg, or ticagrelor 180mg) are recommended at least 6 hours  
40 before PCI procedure. Heparin or an alternative antithrombotic agent (such as bivalirudin)  
41 must be used during the procedure to maintain the activated clotting time (ACT) >280  
42  
43  
44  
45  
46  
47  
48  
49  
50  
51  
52  
53  
54  
55  
56

1  
2  
3 seconds. After PCI, lifelong aspirin in a dose of 100mg/d will be prescribed. Duration of  
4  
5 clopidogrel treatment with 75mg/d (or ticagrelor with 90mg twice a day) is at least  
6  
7 12-month.  
8  
9

10  
11 **Biomarker assessment.** Total creatine kinase (CK), CK-Myocardial-Band isoenzyme (MB),  
12  
13 and troponin T/I are dynamically measured before the procedure and until 72 h  
14  
15 post-procedure.  
16

### 17 18 **Study endpoints**

19  
20 The primary endpoint in the present trial is TLF at 12 months after indexed procedure,  
21  
22 defined by the composite of cardiac death, target vessel MI, and TLR. The major secondary  
23  
24 endpoints include all cause death, MI, target-vessel revascularization (TVR), in-stent  
25  
26 restenosis, stroke, and each individual component of the primary endpoint. The safety  
27  
28 endpoint is the risk of Academic Research Consortium (ARC) defined stent thrombosis.  
29  
30 Other endpoints are listed in [Table 3](#). The detailed definitions of study endpoints are  
31  
32 described in the [Appendix](#).  
33

34 All endpoints are site-reported in an electronic web-based capture system with  
35  
36 additional submission of supporting medical documents. All clinical events are assessed by  
37  
38 an independent committee that was blinded to the study.  
39  
40

### 41 42 **Follow-up**

43 After hospital discharge, clinical follow-up is performed with visits (preferred) or telephone  
44  
45 contact at 1-, 6-, and 12-month. Follow-up will be continued to 5 year after index procedure  
46  
47 annually. Angiographic follow-up will be encouraged for all patients, will be undergone at  
48  
49 13-month after index procedure unless clinically indicated earlier.  
50

### 51 52 53 **Angiographic analysis**

1  
2  
3 Quantitative coronary angiographic (QCA) analysis at baseline, post-procedure and  
4 follow-up is performed by the QCA-laboratories at Nanjing Heart Center. The images are  
5 analyzed by two experienced technicians who are blinded to the study design, with the  
6 inter- and intra-observer variability under 5% (Kappa test).  
7  
8

9  
10 Basic angiograms for all lesions should consist of at least injections after intracoronary  
11 injection of 100-200 µg nitroglycerin. Bifurcation-view must be gained for all patients; there  
12 should be an angulation difference between the two baseline angiograms of at least 30°. The  
13 diagnostic/guiding catheter should be well visible, near the center of the angiogram and  
14 filled with dye. The index lesions should be well visible, near the center of the angiogram  
15 and shown without foreshortening. Between the pre- and post-angiograms all balloon  
16 inflations and stent implantations should be documented by short cine-runs.  
17  
18  
19  
20  
21  
22  
23  
24  
25

### 26 **Statistical analysis**

27  
28 All analysis will be performed in the intent-to-treat (ITT) population, defined as all patients  
29 randomized, regardless of the treatment actually received. The primary variable is time from  
30 randomization to first occurrence of any event from TLF. From previous studies, we  
31 hypothesized that the rate of a 1-year TLF would be 15% in the systematic two-stent  
32 technique group and 25% in the provisional stenting group. Accordingly, a total sample size  
33 of 600 is needed to detect a power of 0.8 (Type II error = 0.2,  $\alpha = 0.05$ , 2-tailed). Because  
34 of the considerable uncertainty, the enrollment is extended to 660 patients (10%  
35 increment).  
36  
37  
38  
39  
40  
41  
42

43 The distribution of continuous variables will be assessed by the Kolmogorov-Smirnov test.  
44 Categorical variables are expressed as frequencies or percentages and compared by  
45 Chi-square statistics or Fisher's exact test. Continuous variables are summarized as means  $\pm$   
46 standard deviation (SD) or median and compared using Students' t-test (for normal data)  
47 and Mann-Whitney U-test (for non-normally distributed variables). Survival curves with  
48 time-to-event data are generated by the Kaplan-Meier method and compared using the  
49 log-rank test. Comparison between the two groups will be performed using the Cox  
50  
51  
52  
53  
54  
55  
56

1  
2  
3 proportional hazard model. A p value <0.05 is considered statistically significance. All  
4 analyses are performed with the use of the statistical program SPSS 24.0 (SPSS Institute Inc,  
5 Chicago, Illinois).  
6  
7

8  
9 The extensive subgroup analysis will be performed to evaluate variation of treatment  
10 effects, as well as a test of interaction with treatment for each subgroup variable. The  
11 substudies of clinical factors include age (age > 75 years old), sex, diabetes mellitus,  
12 hyperlipidemia, hypertension, current smoking, acute coronary syndrome, cardiac  
13 dysfunction (left ventricular ejection fraction < 40%), and renal insufficiency (estimated  
14 glomerular filtration rate < 60ml/min/1.73 m<sup>2</sup>). In addition, the substudies of angiographic  
15 and procedural factors include unprotected distal left main bifurcation lesion, the use of  
16 IVUS, and complete revascularization. Therefore, there are in total of 12 prespecified  
17 subgroup analyses to explore the consistency of effects on two-stent techniques for complex  
18 bifurcation lesions.  
19  
20  
21  
22  
23  
24  
25  
26  
27  
28  
29

### 30 **Trial organization**

31  
32 The trial has been designed by the principal investigator (PI) and the executive committee.  
33  
34 The executive committee members are also responsible for reporting the results, and  
35 drafting the manuscripts. The executive committee, together with the steering committee,  
36 the data and safety monitoring committee, and the independent endpoints adjudication  
37 committee are involved in the present trial.  
38  
39  
40

41 All centers with experience in two-stent techniques (including DK crush and culotte) can  
42 participate in the study. The details about trial organization are listed in the [Appendix](#).  
43  
44  
45

### 46 **Discussion**

47  
48  
49 Several randomized studies have demonstrated that PS technique using a jailed wire in the  
50 SB is the gold standard treatment for the majority of bifurcation lesions<sup>1-6</sup>, however, the  
51 bifurcation lesions enrolled in these studies were not all true bifurcation lesions, either  
52 moderate narrow, or focus lesion at the SB ostium. DKCRUSH II trial<sup>7</sup> has demonstrated  
53  
54  
55  
56

1  
2  
3 that two-stent technique using DK-crush was associated with lower rate of TVR in true  
4 coronary bifurcation lesions with SB lesion length of 15mm compared with PS.  
5 Meta-analysis also showed that two-stent technique remained an optional treatment for  
6 true bifurcation lesions with large side branches<sup>16</sup>. In addition, consensus from European  
7 Bifurcation Club<sup>17</sup> suggested that true bifurcations with large side branches and ostial  
8 disease extending more than 5 mm from the carina are likely to require two-stent  
9 techniques. Therefore, a novel bifurcation classification is needed to identify which  
10 bifurcation lesions should be treated with two-stent techniques instead of provisional  
11 stenting.

12  
13 The practical and easy-to-use classification was proposed in DEFINITION registry by  
14 Shao-Liang Chen<sup>9</sup>, which including 2 major criteria and 6 minor criteria. According to the  
15 newly established criteria, 70% exhibited simple bifurcation lesions, and the remaining 30%  
16 were classified as CBLs in 3660 patients with true coronary bifurcation lesions (Medina  
17 1,1,1 and 0,1,1) and an SB diameter  $\geq 2.5$  mm by visual estimation. As was expected,  
18 two-stent techniques did not show any benefits over provisional stenting for the simple  
19 bifurcation lesions. However, for CBLs two-stent techniques were associated with less  
20 in-hospital mortality and one-year MACE than PS. The important finding will be further  
21 verified in the randomized DEFINITION- II trial.

22  
23 Left main (LM) bifurcation lesions are unique bifurcation lesions. Not only the diameter of  
24 SB is bigger, but also bifurcation angle is huger compared with non-LM bifurcation. The  
25 culotte stenting with bare metal stents has been largely abandoned because of high  
26 restenosis rates. Since the introduction of DESs, culotte stenting has regained its  
27 popularity. Murasato reported the restriction of the stent expansion like a “napkin ring” in  
28 culotte stenting using close-cell design stents<sup>18</sup>. In our bench study, even using open-cell  
29 design stents in T type bifurcation, significant stent underexpansion was revealed in culotte  
30 stenting contrast to DK crush<sup>19</sup>. DKCRUSH-III trial had confirmed that DK crush was  
31 associated with lower TLR and stent thrombosis for LM bifurcation compared with culotte  
32 stenting at 3-year follow-up<sup>10,20</sup>. Considering the shortages of culotte stenting, we strongly

1  
2  
3 recommend use of culotte stenting in non-LM bifurcation instead of LM bifurcations. PS with  
4 jailed balloon is a safer alternative than jailed wire to protect SB, especially for high risk of  
5 SB occlusion after MV stenting <sup>14,15</sup>. Giving CBLs will be enrolled in the study, if a patient is  
6 randomized into PS group, either jailed balloon or jailed wire will be allowed to use at the  
7 discretion of the operators.  
8  
9  
10  
11  
12

### 13 **Conclusions**

14 Strategies for coronary bifurcation lesions should be individualized. PS is the default  
15 approach for simple bifurcation lesions. The DEFINITION II study is investigating whether  
16 systematic two-stent technique will be superior to PS in CBLs regarding the incidence of TLF  
17 at 12 months.  
18  
19  
20  
21  
22  
23  
24  
25  
26  
27  
28  
29  
30  
31  
32  
33  
34  
35  
36  
37  
38  
39  
40  
41  
42  
43  
44  
45  
46  
47  
48  
49  
50  
51  
52  
53  
54  
55  
56  
57  
58  
59  
60

**Table 1. Criteria of complex bifurcation lesions**

| Criteria                                               | Lesion characteristics                                                     |
|--------------------------------------------------------|----------------------------------------------------------------------------|
| Major 1                                                | Distal LM bifurcation: SB-DS $\geq 70\%$ and SB lesion length $\geq 10$ mm |
| Major 2                                                | Non-LM bifurcation: SB-DS $\geq 90\%$ and SB lesion length $\geq 10$ mm    |
| Minor 1                                                | Moderate to severe calcification                                           |
| Minor 2                                                | Multiple lesions                                                           |
| Minor 3                                                | Bifurcation angle $< 45^\circ$ or $> 70^\circ$                             |
| Minor 4:                                               | Main vessel RVD $< 2.5$ mm                                                 |
| Minor 5                                                | Thrombus-containing lesions                                                |
| Minor 6                                                | MV lesion length $\geq 25$ mm                                              |
| Major 1 + any 2 minor 1–6 = complex bifurcation lesion |                                                                            |
| Major 2 + any 2 minor 1–6 = complex bifurcation lesion |                                                                            |

**Table 2 Inclusion and exclusion criteria**

| <b>Inclusion Criteria:</b>                                                                                                                                                                                                                                                                                                                                                                                                                                                                                                                                                                                                                                                                                                                                                                                                                                                                                                                                                    |
|-------------------------------------------------------------------------------------------------------------------------------------------------------------------------------------------------------------------------------------------------------------------------------------------------------------------------------------------------------------------------------------------------------------------------------------------------------------------------------------------------------------------------------------------------------------------------------------------------------------------------------------------------------------------------------------------------------------------------------------------------------------------------------------------------------------------------------------------------------------------------------------------------------------------------------------------------------------------------------|
| <ol style="list-style-type: none"><li>1. Provision of informed consent prior to any study specific procedures;</li><li>2. Men and women 18 years and older;</li><li>3. Established indication to PCI according to the guidelines of American Heart Association and American College of Cardiology;</li><li>4. Native coronary lesion suitable for drug-eluting stent placement;</li><li>5. True bifurcation lesions (Medina 0,1,1/1,1,1 /1,0,1);</li><li>6. Reference vessel diameter in side branch <math>\geq 2.5</math>mm by visual estimation.</li></ol>                                                                                                                                                                                                                                                                                                                                                                                                                  |
| <b>Exclusion Criteria:</b>                                                                                                                                                                                                                                                                                                                                                                                                                                                                                                                                                                                                                                                                                                                                                                                                                                                                                                                                                    |
| <ol style="list-style-type: none"><li>1. Pregnancy and breast feeding mother;</li><li>2. Co-morbidity with an estimated life expectancy of &lt; 50 % at 12 months;</li><li>3. Scheduled major surgery in the next 12 months;</li><li>4. Inability to follow the protocol and comply with follow-up requirements or any other reason that the investigator feels would place the patient at increased risk;</li><li>5. Previous enrolment in this study or treatment with an investigational drug or device under another study protocol in the past 30 days;</li><li>6. Known allergy against ticagrelor, or against clopidogrel, or aspirin History of major hemorrhage (intracranial, gastrointestinal, etc.);</li><li>7. Chronic total occlusion lesion in either LAD, or LCX or RCA not re-canalized;</li><li>8. Severe calcification needing rotational atherectomy;</li><li>9. Patient with STEMI (within 24-hour from the onset of chest pain to admission).</li></ol> |



**Table 3. Study endpoints.**

|                                                                                                                                                                                                                                                                                                                                                                                                                                                                                                                                                                                                                                                                    |
|--------------------------------------------------------------------------------------------------------------------------------------------------------------------------------------------------------------------------------------------------------------------------------------------------------------------------------------------------------------------------------------------------------------------------------------------------------------------------------------------------------------------------------------------------------------------------------------------------------------------------------------------------------------------|
| <p>Primary endpoint</p> <ul style="list-style-type: none"> <li>● Target lesion failure: composite of cardiac death, target vessel myocardial infarction (MI), and target lesion revascularization (TLR) at 12 months</li> </ul>                                                                                                                                                                                                                                                                                                                                                                                                                                    |
| <p>Secondary endpoints</p> <ul style="list-style-type: none"> <li>● All-cause death: cardiac death, non-cardiac death</li> <li>● MI: periprocedural MI, spontaneous MI</li> <li>● Revascularization: TLR, target vessel revascularization (TVR)</li> <li>● Stroke: ischemic stroke, hemorrhagic stroke</li> <li>● Combined endpoint of all-cause death, MI, TVR</li> <li>● In-stent restenosis</li> <li>● Other outcome parameters: NYHA functional class, Braunwald class, net gain of lumen diameter, contrast volume, procedural time, devices consumed during indexed procedure, X-ray exposure time, X-ray dose, DAP-total, DAP-record, DAP-fluoro</li> </ul> |
| <p>Safety endpoints</p> <ul style="list-style-type: none"> <li>● Stent thrombosis</li> <li>● Bleeding complications</li> </ul>                                                                                                                                                                                                                                                                                                                                                                                                                                                                                                                                     |

**Author affiliations**

- 1 Department of Cardiology, Nanjing First Hospital, Nanjing Medical University, Nanjing, China;
- 2
- 3
- 4 Department of Cardiology, The General Hospital of Shenyang Military, Shenyang, China;
- 5
- 6 Department of Cardiology, Nanjing Heart Center, Nanjing, China;
- 7
- 8 Department of Cardiology, Xijing Hospital, 4th Military Medical University, Xi'an, China;
- 9
- 10 Department of Cardiology, Xijing Hospital, 4th Military Medical University, Xi'an, China;
- 11
- 12 Department of Cardiology, Siriraj Hospital, Bangkok, Thailand;
- 13
- 14 Department of Cardiology, Taicang People's Hospital, Taicang, China;
- 15
- 16 Department of Cardiology, Anhui Provincial Hospital, Hefei, China;
- 17
- 18 Department of Cardiology, Huainan Eastern Hospital, Huainan, China;
- 19
- 20 Department of Cardiology, Yixin People's Hospital, Yixin, China;
- 21
- 22 Department of Cardiology, Cangzhou Central Hospital, Cangzhou, China;
- 23
- 24 Binawaluya Cardiac Center, Jakarta, Indonesia;
- 25
- 26 Guangzhou Red Cross Hospital, Guangzhou, China;
- 27
- 28 Shanghai Ruijin Hospital, Shanghai, China;
- 29
- 30 Tongji Hospital, Tongji Medical College, Huazhong University of Science and Technology, Wuhan, China;
- 31
- 32 Medistra Hospital, University of Indonesia, Jakarta, Indonesia;
- 33
- 34 Department of Cardiology, Gansu Provincial Hospital, Lanzhou, China;
- 35
- 36 Department of Cardiology, Beijing Anzhen Hospital, Capital Medical University, Beijing, China;
- 37
- 38 Department of Cardiology, Changshu First People's Hospital, Changshu, China;
- 39
- 40 Cheng-Hsin General Hospital, Taipei, China;
- 41
- 42 Zhangjiagang First People's Hospital, Zhangjiagang, China;
- 43
- 44 Changzhou Hospital of Traditional Chinese Medicine, Changzhou, China;
- 45
- 46 Jiangxi Provincial People's Hospital, Nanchang, China;
- 47
- 48 Bangkok General Hospital, Bangkok, Thailand;
- 49
- 50 Xia'men Zhongshan Hospital, Xia'men, China;
- 51
- 52 Huainan First People's Hospital, Huainan, China;
- 53
- 54 Jintan People's Hospital, Jintan, China;
- 55
- 56 Wuxi Third People's Hospital, Wuxi, China;
- 57
- 58 Daqing Oil General Hospital, Daqing, China;
- 59
- 60 The Second Hospital of Shandong University, Ji'nan, China;

1  
2  
3<sup>39</sup>The Affiliated Hospital of Guangdong Medical University, Guangdong, China;

4<sup>40</sup>University of Turin, Turin, Italy;

5<sup>41</sup>The Affiliated Hospital of Xuzhou Medical University, Xuzhou, China;

6<sup>42</sup>Xuyi People's Hospital, Xuyi, China;

7<sup>43</sup>Wuxi Huishan District People's Hospital, Wuxi, China;

8<sup>44</sup>Anqing First People's Hospital, Anqing, China;

9<sup>45</sup>Liyang Hospital of Traditional Chinese Medicine, Liyang, China;

10<sup>46</sup>Lianyungang Hospital of Traditional Chinese Medicine, Lianyungang, China;

11  
12  
13  
14  
15  
16  
17  
18  
19  
20  
**Acknowledgements** The authors appreciate the contributions of Ling Lin, Hai-Mei Xu, and Ying-Ying Zhao to data collection. They also acknowledge Bao-Xiang Duan, Lin Lin, Ji Yong, and Linda Lison for their contribution in the data and safety monitoring.

### 21 22 23 24 25 26 27 28 29 30 **Contributors**

SLC made substantial contributions to study conception and design, and to the drafting and critical revision of the manuscript. JJZ and XFG wrote the first draft. YLH, JK, LT, and ZG provided data management and statistical expertise. DT, SL, LKM, FL, SY, JZ, MM, LL, RYZ, HSZ, TS, PX, ZNJ, LH, WHY, XSQ, QHL, LH, CP, YW, LJL, LZ, XMW, SYW, QHL, JQY, LLC, FL, AER, LMZ, SQD, KV, YSZ, MYY, CC, IS, YX, YLT, ZLS, QJ, YHZ, XW, FY, NLT, SL, and ZZL provided comments and suggestions in critical revision of the article. All authors approved the final version of the article.

31  
32  
33  
34  
35  
36  
37  
38  
39  
40  
**Funding** The present trial was support by National Science Foundation of China (NSFC 81270191, NSFC 91439118) and Health and Family Planning Commission Foundation of Nanjing (YKK16124)

41  
42  
43  
44  
45  
46  
47  
48  
49  
50  
51  
52  
53  
54  
55  
56  
57  
58  
59  
60  
**Competing interests** None declared.

**Patient consent** Obtained.

**Ethics approval** Institutional Review Board at each participating center.

**Provenance and peer review** Not commissioned; externally peer reviewed.

**Open Access** This is an Open Access article distributed in accordance with the Creative Commons Attribution Non Commercial (CC BY-NC 4.0) license, which permits others to distribute, remix, adapt, build upon this work non-commercially, and license their derivative works on different terms, provided the original work is properly cited and the use is non-commercial. See: <http://creativecommons.org/licenses/by-nc/4.0/>

1  
2  
3 **Figure legend**  
4

5 **Figure. 1** Flowchart of study design.  
6

7 SB: side branch; RVD: reference vessel diameter; DS: diameter stenosis; LMd: left main distal  
8 bifurcation; MV: main vessel; PS: provisional stenting; TLF: target lesion failure; TV-MI:  
9 target-vessel myocardial infarction; TLR: target lesion revascularization.  
10  
11  
12  
13  
14  
15  
16  
17  
18  
19  
20  
21  
22  
23  
24  
25  
26  
27  
28  
29  
30  
31  
32  
33  
34  
35  
36  
37  
38  
39  
40  
41  
42  
43  
44  
45  
46  
47  
48  
49  
50  
51  
52  
53  
54  
55  
56  
57  
58  
59  
60

For peer review only

## Reference

1. Colombo A, Bramucci E, Sacca S, et al. Randomized study of the crush technique versus provisional side-branch stenting in true coronary bifurcations: the CACTUS (Coronary Bifurcations: Application of the Crushing Technique Using Sirolimus-Eluting Stents) Study. *Circulation* 2009;119(1):71-78.
2. Ferenc M, Gick M, Kienzle RP, et al. Randomized trial on routine vs. provisional T-stenting in the treatment of de novo coronary bifurcation lesions. *Eur Heart J* 2008;29(23):2859-2867.
3. Hildick-Smith D, de Belder AJ, Cooter N, et al. Randomized trial of simple versus complex drug-eluting stenting for bifurcation lesions: the British Bifurcation Coronary Study: old, new, and evolving strategies. *Circulation* 2010;121(10):1235-1243.
4. Pan M, de Lezo JS, Medina A, et al. Rapamycin-eluting stents for the treatment of bifurcated coronary lesions: a randomized comparison of a simple versus complex strategy. *Am Heart J* 2004;148(5):857-864.
5. Steigen TK, Maeng M, Wiseth R, et al. Randomized study on simple versus complex stenting of coronary artery bifurcation lesions: the Nordic bifurcation study. *Circulation* 2006;114(18):1955-1961.
6. Colombo A, Moses JW, Morice MC, et al. Randomized study to evaluate sirolimus-eluting stents implanted at coronary bifurcation lesions. *Circulation* 2004;109(10):1244-1249.
7. Chen SL, Santoso T, Zhang JJ, et al. A randomized clinical study comparing double kissing crush with provisional stenting for treatment of coronary bifurcation lesions: results from the DKCRUSH-II (Double Kissing Crush versus Provisional Stenting Technique for Treatment of Coronary Bifurcation Lesions) trial. *J Am Coll Cardiol* 2011;57(8):914-920.
8. Lin QF, Luo YK, Lin CG, Peng YF, Zhen XC, Chen LL. Choice of stenting strategy in true coronary artery bifurcation lesions. *Coron Artery Dis* 2010;21(6):345-351.
9. Chen SL, Sheiban I, Xu B, et al. Impact of the complexity of bifurcation lesions treated with drug-eluting stents: the DEFINITION study (Definitions and impact of complex bifurcation lesions on clinical outcomes after percutaneous coronary intervention using drug-eluting stents). *JACC Cardiovasc Interv* 2014;7(11):1266-1276.
10. Chen SL, Xu B, Han YL, et al. Comparison of double kissing crush versus Culotte stenting for unprotected distal left main bifurcation lesions: results from a multicenter, randomized, prospective DKCRUSH-III study. *J Am Coll Cardiol* 2013;61(14):1482-1488.
11. Chen SL, Ye F, Zhang JJ, et al. [DK crush technique: modified treatment of bifurcation lesions in coronary artery]. *Chin Med J (Engl)* 2005;118(20):1746-1750.
12. Chen SL, Zhang JJ, Ye F, et al. Study comparing the double kissing (DK) crush with classical crush for the treatment of coronary bifurcation lesions: the DKCRUSH-1 Bifurcation Study with drug-eluting stents. *Eur J Clin Invest* 2008;38(6):361-371.
13. Chevalier B, Glatt B, Royer T, Guyon P. Placement of coronary stents in bifurcation

- 1  
2  
3 lesions by the "culotte" technique. *Am J Cardiol* 1998;82(8):943-949.
- 4 14. Depta JP, Patel Y, Patel JS, et al. Long-term clinical outcomes with the use of a  
5 modified provisional jailed-balloon stenting technique for the treatment of nonleft  
6 main coronary bifurcation lesions. *Catheter Cardiovasc Interv* 2013;82(5):E637-646.
- 7  
8 15. Singh J, Patel Y, Depta JP, et al. A modified provisional stenting approach to coronary  
9 bifurcation lesions: clinical application of the "jailed-balloon technique". *J Interv*  
10 *Cardiol* 2012;25(3):289-296.
- 11  
12 16. Gao XF, Zhang YJ, Tian NL, et al. Stenting strategy for coronary artery bifurcation with  
13 drug-eluting stents: a meta-analysis of nine randomised trials and systematic review.  
14 *EuroIntervention* 2014;10(5):561-569.
- 15  
16 17. Stankovic G, Lefevre T, Chieffo A, et al. Consensus from the 7th European Bifurcation  
17 Club meeting. *EuroIntervention* 2013;9(1):36-45.
- 18  
19 18. Murasato Y, Hikichi Y, Horiuchi M. Examination of stent deformation and gap  
20 formation after complex stenting of left main coronary artery bifurcations using  
21 microfocus computed tomography. *J Interv Cardiol* 2009;22(2):135-144.
- 22  
23 19. Rab T, Sheiban I, Louvard Y, Sawaya FJ, Zhang JJ, Chen SL. Current Interventions for  
24 the Left Main Bifurcation. *JACC Cardiovasc Interv* 2017;10(9):849-865.
- 25  
26 20. Chen SL, Xu B, Han YL, et al. Clinical Outcome After DK Crush Versus Culotte Stenting  
27 of Distal Left Main Bifurcation Lesions: The 3-Year Follow-Up Results of the  
28 DKCRUSH-III Study. *JACC Cardiovasc Interv* 2015;8(10):1335-1342.
- 29  
30  
31  
32  
33  
34  
35  
36  
37  
38  
39  
40  
41  
42  
43  
44  
45  
46  
47  
48  
49  
50  
51  
52  
53  
54  
55  
56  
57  
58  
59  
60

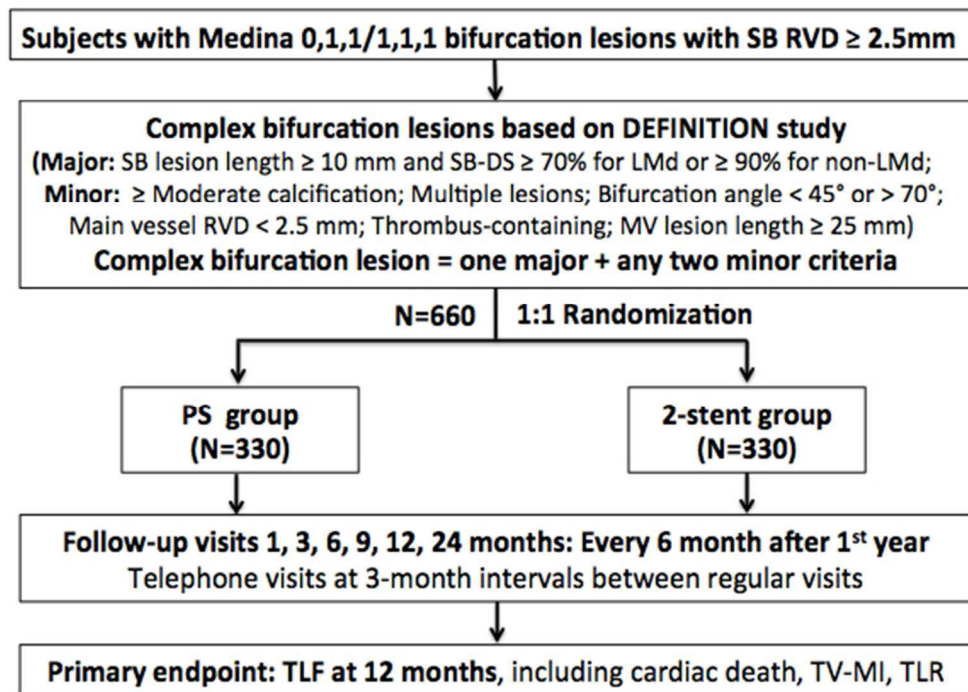

Flowchart of study design.

49x35mm (300 x 300 DPI)

### Appendix 1. Definitions of major study endpoints

| Endpoint              | Definition                                                                                                                                                                                                                                                                                                                                                                                                                                                                                                                                                                                                                                                                                                                                                                                                                                                                                                                                                                                                                                                                                                                                                                                                                                                                                                                                                                                                                                                                                                                                                           |
|-----------------------|----------------------------------------------------------------------------------------------------------------------------------------------------------------------------------------------------------------------------------------------------------------------------------------------------------------------------------------------------------------------------------------------------------------------------------------------------------------------------------------------------------------------------------------------------------------------------------------------------------------------------------------------------------------------------------------------------------------------------------------------------------------------------------------------------------------------------------------------------------------------------------------------------------------------------------------------------------------------------------------------------------------------------------------------------------------------------------------------------------------------------------------------------------------------------------------------------------------------------------------------------------------------------------------------------------------------------------------------------------------------------------------------------------------------------------------------------------------------------------------------------------------------------------------------------------------------|
| Death                 | <ul style="list-style-type: none"> <li>● <b>Cardiovascular death</b> includes sudden cardiac death, death due to acute myocardial infarction (MI), arrhythmia, heart failure, stroke, other cardiovascular causes, or bleeding</li> <li>● <b>Non-cardiovascular death</b> is defined as any death with known cause not of cardiac or vascular cause</li> <li>● All deaths are considered cardiac in origin unless a non-cardiac cause is confirmed clinically or at autopsy.</li> </ul>                                                                                                                                                                                                                                                                                                                                                                                                                                                                                                                                                                                                                                                                                                                                                                                                                                                                                                                                                                                                                                                                              |
| Myocardial infarction | <p><b>Post-procedure MI:</b> occurrence within 48 hours after PCI</p> <ul style="list-style-type: none"> <li>● Patients with normal baseline CK-MB: the peak CK-MB measured within 48 hours of the procedure rises to <math>\geq 10 \times</math> upper reference limit (URL), or to <math>\geq 5 \times</math> URL with new pathologic Q-waves in at least 2 contiguous leads or new persistent left bundle branch block (LBBB)</li> <li>● Patients with elevated baseline CK-MB in whom the biomarker levels are stable or falling: the CK-MB rises by an absolute increment equal to those levels recommended above from the most recent pre-procedure level</li> </ul> <p><b>Spontaneous MI:</b> occurrence more than 48 hours after PCI</p> <ul style="list-style-type: none"> <li>● The rise of cardiac biomarkers (CK-MB or troponin) <math>&gt; 1 \times</math> URL, with one of the follows: <ul style="list-style-type: none"> <li>➤ Evidence of prolonged ischemia as demonstrated by prolonged chest pain</li> <li>➤ Ischemic ST-segment changes or new pathological Q waves</li> <li>➤ Angiographic evidence of a flow limiting complication</li> <li>➤ Imaging evidence of new loss of viable myocardium or new regional wall motion abnormality</li> </ul> </li> </ul> <p><b>Target vessel MI:</b> spontaneous MI associated with target vessel, which was identified by electrocardiographic changes or coronary angiography.</p> <p>Each MI will also be classified as ST-segment elevation MI (STEMI) and non-ST-segment elevation MI (NSTEMI)</p> |
| Revascularization     | <p><b>Target lesion revascularization (TLR)</b></p> <ul style="list-style-type: none"> <li>● Repeat revascularization (including PCI and coronary artery bypass grafting) for target lesions, in the presence of symptoms or objective signs of ischemia</li> </ul> <p><b>Target vessel revascularization (TVR)</b></p> <ul style="list-style-type: none"> <li>● Repeat revascularization (including PCI and coronary artery bypass grafting) for target vessels, in the presence of symptoms or objective signs of ischemia</li> </ul>                                                                                                                                                                                                                                                                                                                                                                                                                                                                                                                                                                                                                                                                                                                                                                                                                                                                                                                                                                                                                              |



|                  |                                                                                                                                                                                                                                                                                                                                                                                                                                                                                                                                                                                                                                                                                                                                                                                                                                                                                                                                                                    |
|------------------|--------------------------------------------------------------------------------------------------------------------------------------------------------------------------------------------------------------------------------------------------------------------------------------------------------------------------------------------------------------------------------------------------------------------------------------------------------------------------------------------------------------------------------------------------------------------------------------------------------------------------------------------------------------------------------------------------------------------------------------------------------------------------------------------------------------------------------------------------------------------------------------------------------------------------------------------------------------------|
|                  | <p><b>Target vessel non-target lesion revascularization</b></p> <ul style="list-style-type: none"> <li>● Target vessel non-target lesion consists of a lesion in the epicardial vessel/branch/graft that contains the target lesion; however, this lesion is outside of the target lesion by at least 5 mm distal or proximal to the target lesion determined by quantitative coronary angiography</li> </ul>                                                                                                                                                                                                                                                                                                                                                                                                                                                                                                                                                      |
| Stent thrombosis | <p>Academic Research Consortium (ARC) classification</p> <p><b>Definite stent thrombosis</b></p> <ul style="list-style-type: none"> <li>● Symptoms suggestive of an acute coronary syndrome and angiographic or pathological confirmation of stent thrombosis</li> </ul> <p><b>Probable stent thrombosis</b></p> <ul style="list-style-type: none"> <li>● Unexplained death within 30 days or target vessel myocardial infarction without angiographic confirmation of stent thrombosis</li> </ul> <p><b>Possible stent thrombosis</b></p> <ul style="list-style-type: none"> <li>● Any unexplained death after 30 days</li> </ul> <p>Stent thrombosis will also be classified as acute stent thrombosis (0–24 hours after PCI), subacute stent thrombosis (24 hours–30 days), late stent thrombosis (31 days–1 year), or very late stent thrombosis (&gt;1 year)</p>                                                                                              |
| Bleeding         | <p>Bleeding Academic Research Consortium (BARC) classification</p> <p><b>Type 0:</b> no bleeding</p> <p><b>Type 1:</b> bleeding that is not actionable and does not cause the patient to seek unscheduled performance of studies, hospitalization, or treatment</p> <p><b>Type 2:</b> any overt, actionable sign of hemorrhage that does not fit the criteria for 3, 4, or 5</p> <p><b>Type 3:</b></p> <ul style="list-style-type: none"> <li>● <b>Type 3a:</b> overt bleeding with hemoglobin drop of 3 to 5 g/dl; any transfusion with overt bleeding</li> <li>● <b>Type 3b:</b> overt bleeding with hemoglobin drop <math>\geq</math> 5g/dl; cardiac tamponade; bleeding requiring surgical intervention for control; bleeding requiring intravenous vasoactive agents</li> <li>● <b>Type 3c:</b> intracranial hemorrhage; intraocular bleeding compromising vision</li> </ul> <p><b>Type 4:</b> CABG-related bleeding</p> <p><b>Type 5:</b> fatal bleeding</p> |
| Stroke           | <p>Global or focal cerebral, spinal cord, or retinal injury resulting in acute neurological dysfunction and was further classified into ischemic and hemorrhagic stroke</p>                                                                                                                                                                                                                                                                                                                                                                                                                                                                                                                                                                                                                                                                                                                                                                                        |

## Appendix 2. Trial organization

### Principal investigator:

Shao-Liang Chen, Nanjing First Hospital, Nanjing Medical University

### Steering committee:

Shao-Liang Chen, Gregg W Stone, Bo Xu , Imad Sheiban, Ya-ling Han

### Core laboratory:

Nanjing Heart Center

### Study statistician:

School of Public Health, Nanjing Medical University

### Data and safety monitoring committee:

Bao-Xiang Duan, Lin Lin, Ji Yong, Linda Lison

### Participating hospitals and collaborators of DEFINITION II trial:

1. Nanjing First Hospital, Nanjing Medical University, Nanjing, China;
2. The General Hospital of Shenyang Military, Shenyang, China;
3. Xijing Hospital, 4th Military Medical University, Xi'an, China;
4. Medicine Siriraj Hospital, Bangkok, Thailand;
5. Taicang People's Hospital, Taicang, China;
6. Anhui Provincial Hospital, Hefei, China;
7. Huainan Eastern Hospital, Huainan, China;
8. Yixin People's Hospital, Yixin, China;
9. Cangzhou Central Hospital, Cangzhou, China;
10. Binawaluya Cardiac Center, Jakarta, Indonesia;
11. Guangzhou Red Cross Hospital, Guangzhou, China;
12. Shanghai Ruijin Hospital, Shanghai, China;
13. Tongji Hospital, Tongji Medical College, Huazhong University of Science and Technology, Wuhan, China;
14. Medistra Hospital, University of Indonesia, Jakarta, Indonesia;
15. Gansu Provincial Hospital, Lanzhou, China;
16. Beijing Anzhen Hospital, Capital Medical University, Beijing, China;
17. Changshu First People's Hospital, Changshu, China;
18. Cheng-Hsin General Hospital, Taipei, China;
19. Zhangjiagang First People's Hospital, ZhangjiaGang, China;
20. Changzhou Hospital of Traditional Chinese Medicine, Changzhou, China;
21. Jiangxi Provincial People's Hospital, Nanchang, China;
22. Bangkok General Hospital, Bangkok, Thailand;
23. Xia'Men Zhongshan Hospital, Xia'Men, China;
24. Huainan First People's Hospital, Huainan, China;
25. Jintan People's Hospital, Jintan, China;

- 1
- 2
- 3 26. Wuxi Third People 's Hospital, Wuxi, China;
- 4 27. Daqing Oil General Hospital, Daqing, China;
- 5 28. The Second Hospital of Shandong University, Ji'nan, China;
- 6 29. Xinyang Central Hospital, Xinyang, China;
- 7 30. Fujian Union Hospital, Fuzhou, China;
- 8 31. Jilin Heart Hospital, Changchun, China;
- 9 32. Otamendi Hospital, Buenos Aires, Argentina;
- 10 33. Chuzhou First People 's Hospital, Chuzhou, China;
- 11 34. Huainan Xinhua Hospital, Huainan, China;
- 12 35. Bangle Hospital, Bangkok, Thailand;
- 13 36. Huai'an Second People's Hospital, Huai'an, China;
- 14 37. Qingdao Fuwai Hospital, Qingdao, China;
- 15 38. The Affiliated Hospital of Guangdong Medical University, Guangdong, China;
- 16 39. University of Turin, Turin, Italy;
- 17 40. The Affiliated Hospital of Xuzhou Medical University, Xuzhou, China;
- 18 41. Xuyi People's Hospital, Xuyi, China;
- 19 42. Wuxi Huishan District People's Hospital, Wuxi, China;
- 20 43. Anqing First People's Hospital, Anqing, China;
- 21 44. Liyang Hospital of Traditional Chinese Medicine, Liyang, China;
- 22 45. Lianyungang Hospital of Traditional Chinese Medicine, Lianyungang, China;
- 23
- 24
- 25
- 26
- 27
- 28
- 29
- 30
- 31
- 32
- 33
- 34
- 35
- 36
- 37
- 38
- 39
- 40
- 41
- 42
- 43
- 44
- 45
- 46
- 47
- 48
- 49
- 50
- 51
- 52
- 53
- 54
- 55
- 56
- 57
- 58
- 59
- 60

# BMJ Open

## The treatment effects of systematic two-stent and provisional stenting techniques in patients with complex coronary bifurcation lesions: Rationale and design of a prospective, randomized, and multicenter DEFINITION II Trial

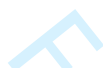

|                               |                                                                                                                                                                                                                                                                                                                                                                                                                                                                                                                                                                                                                                                                                                                                                                                                                                                                                                                                                                                                                                                                                                                                                                                                                                                                                                                                                                                                                                                                                                                                                                                                                                                                                                                                                                                                                                                                                                                                                                                                                                                                                                                                                                                                                                                                  |
|-------------------------------|------------------------------------------------------------------------------------------------------------------------------------------------------------------------------------------------------------------------------------------------------------------------------------------------------------------------------------------------------------------------------------------------------------------------------------------------------------------------------------------------------------------------------------------------------------------------------------------------------------------------------------------------------------------------------------------------------------------------------------------------------------------------------------------------------------------------------------------------------------------------------------------------------------------------------------------------------------------------------------------------------------------------------------------------------------------------------------------------------------------------------------------------------------------------------------------------------------------------------------------------------------------------------------------------------------------------------------------------------------------------------------------------------------------------------------------------------------------------------------------------------------------------------------------------------------------------------------------------------------------------------------------------------------------------------------------------------------------------------------------------------------------------------------------------------------------------------------------------------------------------------------------------------------------------------------------------------------------------------------------------------------------------------------------------------------------------------------------------------------------------------------------------------------------------------------------------------------------------------------------------------------------|
| Journal:                      | <i>BMJ Open</i>                                                                                                                                                                                                                                                                                                                                                                                                                                                                                                                                                                                                                                                                                                                                                                                                                                                                                                                                                                                                                                                                                                                                                                                                                                                                                                                                                                                                                                                                                                                                                                                                                                                                                                                                                                                                                                                                                                                                                                                                                                                                                                                                                                                                                                                  |
| Manuscript ID                 | bmjopen-2017-020019.R1                                                                                                                                                                                                                                                                                                                                                                                                                                                                                                                                                                                                                                                                                                                                                                                                                                                                                                                                                                                                                                                                                                                                                                                                                                                                                                                                                                                                                                                                                                                                                                                                                                                                                                                                                                                                                                                                                                                                                                                                                                                                                                                                                                                                                                           |
| Article Type:                 | Protocol                                                                                                                                                                                                                                                                                                                                                                                                                                                                                                                                                                                                                                                                                                                                                                                                                                                                                                                                                                                                                                                                                                                                                                                                                                                                                                                                                                                                                                                                                                                                                                                                                                                                                                                                                                                                                                                                                                                                                                                                                                                                                                                                                                                                                                                         |
| Date Submitted by the Author: | 24-Nov-2017                                                                                                                                                                                                                                                                                                                                                                                                                                                                                                                                                                                                                                                                                                                                                                                                                                                                                                                                                                                                                                                                                                                                                                                                                                                                                                                                                                                                                                                                                                                                                                                                                                                                                                                                                                                                                                                                                                                                                                                                                                                                                                                                                                                                                                                      |
| Complete List of Authors:     | <p>Zhang, Junjie; Nanjing First Hospital, Department of Cardiology<br/> Gao, Xiaofei; Nanjing First Hospital, Department of Cardiology<br/> Han, YL; The General Hospital of Shenyang Military, Department of Cardiology<br/> Kan, Jing; Nanjing Heart Center, Department of Cardiology<br/> Tao, Ling; Xijing Hospital, 4th Military Medical University, Department of Cardiology<br/> Ge, Zhen; Nanjing First Hospital, Department of Cardiology<br/> Tresukosol, Damras; Medicine Siriraj Hospital, Mahidol University, cardiology<br/> Lu, Shu; Taicang People's Hospital, Department of Cardiology<br/> Ma, Likun; Anhui Provincial Hospital, Department of Cardiology<br/> Li, Feng; Huainan Eastern Hospital, Department of Cardiology<br/> Yang, Song; Yixin People's Hospital, Department of Cardiology<br/> Zhang, Jun; Cangzhou Central Hospital, Department of Cardiology<br/> Munawar, Muhammad; Binawaluya Cardiac Center, Department of Cardiology<br/> Li, Li; Guangzhou Red Cross Hospital, Department of Cardiology<br/> Zhang, Ruiyan; Shanghai Ruijin Hospital, Department of Cardiology<br/> Zeng, Hesong; Tongji Hospital, Tongji Medical College, Huazhong University of Science and Technology, Department of Cardiology<br/> Santoso, Teguh; Medistra Hospital, University of Indonesia, cardiology<br/> Xie, Ping; Gansu Provincial Hospital, Department of Cardiology<br/> Jin, Zening; Beijing Anzhen Hospital, Department of Cardiology<br/> Han, Leng; Changshu First People's Hospital, Department of Cardiology<br/> Yin, Wei-Hsian; Cheng-Hsin General Hospital, cardiology<br/> Qian, Xuesong; Zhangjiagang First People's Hospital, Department of Cardiology<br/> Li, Qihua; Changzhou Hospital of Traditional Chinese Medicine, Department of Cardiology<br/> Hong, Lang; Jiangxi Provincial People's Hospital, Department of Cardiology<br/> Paiboon, Chotnoparapat; Bangkok General Hospital, cardiology<br/> Wang, Yan; Xia'Men Zhongshan Hospital, cardiology<br/> Liu, Lijun; Huainan First People's Hospital, Department of Cardiology<br/> Zhou, Lei; Jintan People's Hospital, cardiology<br/> Wu, Xueming; Wuxi Third People 's Hospital, cardiology<br/> Wen, Shangyu; Daqing Oil General Hospital, cardiology</p> |

|                                    |                                                                                                                                                                                                                                                                                                                                                                                                                                                                                                                                                                                                                                                                                                                                                                                                                                                                                                                                                                                                                                                                                                                                                                                                                                                                                                                                                                                                                                                                                                                                                 |
|------------------------------------|-------------------------------------------------------------------------------------------------------------------------------------------------------------------------------------------------------------------------------------------------------------------------------------------------------------------------------------------------------------------------------------------------------------------------------------------------------------------------------------------------------------------------------------------------------------------------------------------------------------------------------------------------------------------------------------------------------------------------------------------------------------------------------------------------------------------------------------------------------------------------------------------------------------------------------------------------------------------------------------------------------------------------------------------------------------------------------------------------------------------------------------------------------------------------------------------------------------------------------------------------------------------------------------------------------------------------------------------------------------------------------------------------------------------------------------------------------------------------------------------------------------------------------------------------|
|                                    | Lu, Qinghua; The Second Hospital of Shandong University, cardiology<br>Yuan, Junqiang; Xinyang Central Hospital, cardiology<br>Chen, Lianglong; Fujian Union Hospital, cardiology<br>Lavarra, Francesco; Jilin Heart Hospital, cardiology<br>Rodríguez, Alfredo E. ; Otamendi Hospital, cardiology<br>Zhou, Limin; Chuzhou First People 's Hospital, cardiology<br>Ding, Shiqin; Huainan Xinhua Hospital, cardiology<br>Vichairuangthum, Kitigon; Bangplee Hospital, cardiology<br>Zhu, Yuansheng; Huai'an Second People's Hospital, cardiology<br>Yu, Mengyue; Qingdao Fuwai Hospital, cardiology<br>Chen, Chan; The Affiliated Hospital of Guangdong Medical University, cardiology<br>Sheiban, Imad; Pederzoli Hospital, cardiology<br>Xia, Yong; The Affiliated Hospital of Xuzhou Medical University, cardiology<br>Tian, Yulong; Xuyi People's Hospital, cardiology<br>Shang, Zhenglu ; Wuxi Huishan District People's Hospital, cardiology<br>Jiang, Qing; Anqing First People's Hospital, cardiology<br>Zhen, Yonghong; Liyang Hospital of Traditional Chinese Medicine, cardiology<br>Wang, Xin; Lianyungang Hospital of Traditional Chinese Medicine, cardiology<br>Ye, Fei; Nanjing First Hospital, Department of Cardiology<br>Tian, Nailiang; Nanjing First Hospital, Department of Cardiology<br>Lin, Song; Nanjing First Hospital, Department of Cardiology<br>Liu, Zhizhong; Nanjing First Hospital, Department of Cardiology<br>Chen, Shao-Liang; Nanjing First Hospital, Nanjing Medical University, Department of Cardiology |
| <b>Primary Subject Heading</b> :   | Cardiovascular medicine                                                                                                                                                                                                                                                                                                                                                                                                                                                                                                                                                                                                                                                                                                                                                                                                                                                                                                                                                                                                                                                                                                                                                                                                                                                                                                                                                                                                                                                                                                                         |
| <b>Secondary Subject Heading</b> : | Medical management                                                                                                                                                                                                                                                                                                                                                                                                                                                                                                                                                                                                                                                                                                                                                                                                                                                                                                                                                                                                                                                                                                                                                                                                                                                                                                                                                                                                                                                                                                                              |
| <b>Keywords</b> :                  | coronary bifurcation lesions, systematic two-stent techniques, provisional stenting technique                                                                                                                                                                                                                                                                                                                                                                                                                                                                                                                                                                                                                                                                                                                                                                                                                                                                                                                                                                                                                                                                                                                                                                                                                                                                                                                                                                                                                                                   |
|                                    |                                                                                                                                                                                                                                                                                                                                                                                                                                                                                                                                                                                                                                                                                                                                                                                                                                                                                                                                                                                                                                                                                                                                                                                                                                                                                                                                                                                                                                                                                                                                                 |

SCHOLARONE™  
Manuscripts

1  
2  
3  
4  
5  
6  
7  
8  
9  
10  
11  
12  
13  
14  
15  
16  
17  
18  
19  
20  
21  
22  
23  
24  
25  
26  
27  
28  
29  
30  
31  
32  
33  
34  
35  
36  
37  
38  
39  
40  
41  
42  
43  
44  
45  
46  
47  
48  
49  
50  
51  
52  
53  
54  
55  
56  
57  
58  
59  
60

1     **The treatment effects of systematic two-stent and provisional stenting techniques in**  
2           **patients with complex coronary bifurcation lesions: Rationale and design of a**  
3                   **prospective, randomized, and multicenter DEFINITION II Trial**

4  
5 Jun-Jie Zhang,<sup>1</sup> Xiao-Fei Gao,<sup>1</sup> Ya-Ling Han,<sup>2</sup> Jing Kan,<sup>3</sup> Ling Tao,<sup>4</sup> Zhen Ge,<sup>1</sup> Damras  
6 Tresukosol,<sup>5</sup> Shu Lu,<sup>6</sup> Li-Kun Ma,<sup>7</sup> Feng Li,<sup>8</sup> Song Yang,<sup>9</sup> Jun Zhang,<sup>10</sup> Muhammad Munawar,<sup>11</sup>  
7 Li Li,<sup>12</sup> Rui-Yan Zhang,<sup>13</sup> He-Song Zeng,<sup>14</sup> Teguh Santoso,<sup>15</sup> Ping Xie,<sup>16</sup> Ze-Ning Jin,<sup>17</sup> Leng  
8 Han,<sup>18</sup> Wei-Hsian Yin,<sup>19</sup> Xue-Song Qian,<sup>20</sup> Qi-Hua Li,<sup>21</sup> Lang Hong,<sup>22</sup> Chotnoparatpat  
9 Paiboon,<sup>23</sup> Yan Wang,<sup>24</sup> Li-Jun Liu,<sup>25</sup> Lei Zhou,<sup>26</sup> Xue-Ming Wu,<sup>27</sup> Shang-Yu Wen,<sup>28</sup> Qing-Hua  
10 Lu,<sup>29</sup> Jun-Qiang Yuan,<sup>30</sup> Liang-Long Chen,<sup>31</sup> Francesco Lavarra,<sup>32</sup> Alfredo E. Rodríguez,<sup>33</sup>  
11 Li-Min Zhou,<sup>34</sup> Shi-Qin Ding,<sup>35</sup> Kitigon Vichairuangthum,<sup>36</sup> Yuan-Sheng Zhu,<sup>37</sup> Meng-Yue Yu,<sup>38</sup>  
12 Chan Chen,<sup>39</sup> Imad Sheiban,<sup>40</sup> Yong Xia,<sup>41</sup> Yu-Long Tian,<sup>42</sup> Zheng-Lu Shang,<sup>43</sup> Qing Jiang,<sup>44</sup>  
13 Yong-Hong Zhen,<sup>45</sup> Xin Wang,<sup>46</sup> Fei Ye,<sup>1</sup> Nai-Liang Tian,<sup>1</sup> Song Lin,<sup>1</sup> Zhi-Zhong Liu,<sup>1</sup>  
14 Shao-Liang Chen,<sup>1,3\*</sup>

15  
16 Zhang JJ and Gao XF contributed equally to this work.

17  
18 **\*Correspondence author:** Shao-Liang Chen, Department of cardiology, Nanjing First  
19 Hospital, Nanjing Medical University; No. 68 Changle road, 210006 Nanjing, China; Tel & Fax:  
20 +86-25-52208048; E-mail: [chmengx@126.com](mailto:chmengx@126.com).

1  
2  
3 **1 Abstract**  
4

5 **2 Introduction:** Provisional stenting (PS) for simple coronary bifurcation lesions is the  
6  
7 3 mainstay of treatment. A systematic two-stent approach is widely used for complex  
8  
9 4 bifurcation lesions (CBLs). However, a randomized comparison of PS and two-stent  
10  
11 5 techniques for CBLs has never been studied. Accordingly, the present study is designed to  
12  
13 6 elucidate the benefits of two-stent treatment over PS in patients with CBLs.  
14

15 **7 Methods and analysis:** This DEFINITION II study is a prospective, multinational,  
16  
17 8 randomized, endpoint-driven trial to compare the benefits of the two-stent technique with  
18  
19 9 PS for CBLs. A total of 660 patients with CBLs will be randomized in a 1:1 fashion to receive  
20  
21 10 either PS or the two-stent technique. The primary endpoint is the rate of 12-month target  
22  
23 11 lesion failure (TLF) defined as the composite of cardiac death, target vessel myocardial  
24  
25 12 infarction (MI), and clinically driven target lesion revascularization (TLR). The major  
26  
27 13 secondary endpoints include all causes of death, MI, target vessel revascularization (TVR),  
28  
29 14 in-stent restenosis, stroke, and each individual component of the primary endpoints. The  
30  
31 15 safety endpoint is the occurrence of definite or probable stent thrombosis (ST).  
32

33 **16 Ethics and dissemination:** The study protocol and informed consent have been approved  
34  
35 17 by the Institutional Review Board of Nanjing First Hospital, and accepted by each  
36  
37 18 participating center. Written informed consent was obtained from all enrolled patients.  
38  
39 19 Findings of the study will be published in a peer-reviewed journal and disseminated at  
40  
41 20 conferences.  
42

43 **21 Trial registration number:** NCT02284750; Pre-results.  
44  
45 22  
46  
47  
48  
49  
50  
51  
52  
53  
54  
55  
56  
57  
58  
59  
60

### 1 **Strengths and limitations of this study**

- 2 ➤ This is the first prospective, multinational, randomized, endpoint-driven trial to  
3 compare the systematic two-stent and provisional stenting (PS) techniques in patients  
4 with complex coronary bifurcation lesions (CBLs).  
5
- 6 ➤ This study is built on the DEFINITION registry, which for the first time introduced an  
7 anatomical differentiation of coronary bifurcation lesion complexity and reported that  
8 PS for CBLs was associated with an increment of cardiac death compared with simple  
9 bifurcation lesions.  
10
- 11 ➤ Selection of primary and secondary endpoints is in accordance with current practice in  
12 other cardiovascular clinical trials.  
13
- 14 ➤ All participating sites are well-versed in two-stent techniques (including double kissing  
15 crush and culotte), which may not be reflective of clinical practice in smaller hospitals.  
16  
17  
18  
19



## 1 **Background**

2 Percutaneous coronary intervention (PCI) for bifurcation lesions is technically demanding  
3 and has a poor outcome at follow-up, as reflected by more frequent occurrences of in-stent  
4 restenosis (most localize at the ostium of the daughter branch) and more requirements for  
5 revascularization. For a great majority of coronary bifurcation lesions, particularly when a  
6 small (diameter<2.0 mm) side branch (SB) with a focal (usually <5 mm in length) lesion is  
7 involved, provisional stenting (PS) is considered as the default approach<sup>1-6</sup>. However, the  
8 efficacy of PS for a larger ( $\geq 2.5$  mm in diameter) SB with a longer lesion (>5 mm in length) is  
9 underreported<sup>7,8</sup>. Furthermore, there is a lack of angiographical criteria for differentiating  
10 simple from complex bifurcation lesions (CBLs). In this regard, the DEFINITION registry  
11 study <sup>9</sup> introduced for the first time an anatomical differentiation of bifurcation lesion  
12 complexity, which consisted of 2 major and 6 minor criteria. Based on the DEFINITION  
13 criteria, a CBLs is defined as one major plus any two minor criteria. Investigators further  
14 reported that PS for CBLs was associated with an increment in cardiac death and major  
15 adverse cardiac events (MACE) compared with simple bifurcation lesions. Unfortunately, PS  
16 has not been compared with systematic two-stent techniques in a randomized fashion for  
17 patients with CBLs. Therefore, we design this prospective, multi-center, randomized  
18 (DEFINITION II) study to investigate the superiority of systematic two-stent approaches  
19 for PS treatment for patients with CBLs, as classified by the DEFINITION registry.

## 20 **Methods and analysis**

### 21 **Study hypothesis**

22 This study is designed to test the hypothesis that the application of systematic two-stent  
23 techniques will lead to a lower rate of target lesion failure (TLF), including cardiac death,  
24 target-vessel myocardial infarction (MI), or clinically driven target lesion revascularization  
25 (TLR), compared to the PS technique, in patients with CBLs at 12 months after the indexed  
26 PCI procedure. CBLs are defined according to the DEFINITION study <sup>9</sup>, and the criteria are  
27 shown in [Table 1](#).

1

## 2 **Study design**

3 This is a prospective, multi-center, randomized, controlled, superiority trial at up to 45 sites  
4 worldwide (Appendix) to enroll 660 subjects with CBLs in a native coronary artery. The  
5 overall study flowchart is presented in [Figure 1](#). This study has been registered at  
6 [clinicaltrials.gov](http://clinicaltrials.gov) (NCT02284750), according to the statement of the International  
7 Committee of Medical Journal Editors.

8

## 9 **Study population and randomization**

10 The 660 patients scheduled for elective PCI with CBLs suitable for drug-eluting stent (DES)  
11 implantation are openly randomized 1:1 to either the systematic two-stent or the PS  
12 technique. Detailed inclusion and exclusion criteria for the present study are listed in [Table](#)  
13 [2](#). The planned enrollment duration is between December 2015 and December 2018, and  
14 the enrollment period may be extended if necessary. There are 446 patients enrolled up to  
15 September 2017.

16 A randomization serial number for patients will be created by the Interactive Web  
17 Randomization System (IWRS). The randomization serial number for each participating  
18 center will be generated by the same system.

19

## 20 **Study intervention and medication**

21 Patients allocated to the two-stent group will receive the double kissing (DK) crush, or the  
22 culotte technique.

23 **DK crush technique.** The DK crush stenting technique has been described in detail  
24 elsewhere <sup>7,10-12</sup>. Briefly, a stent with a stent/artery ratio of 1.1:1 is advanced into a side  
25 branch (SB). Another balloon with balloon/artery ratio of 1:1 is positioned in the main  
26 vessel (MV). Inflating the SB stent with a 2-3 mm protrusion into the MV, and then the stent  
27 balloon and SB wire are removed after confirming that there is no dissection in the distal SB  
28 by angiogram. Inflating the previous balloon in the MV performs the first crush. First, the

5

1 kissing balloon inflation is performed after rewiring the SB from the proximal stent cell. An  
2 MV stent with a stent/artery ratio of 1.1:1 is inflated and crushes the SB stent again, which is  
3 then followed by rewiring the SB and the final kissing balloon inflation (FKBI). A proximal  
4 optimization technique (POT) should be performed before and after FKBI. Post dilatation  
5 with a non-complaint balloon is recommended for all stents, with a suggested inflation  
6 pressure > 18 atm.

7 **Culotte technique.** Culotte stenting has been described in detail elsewhere<sup>13</sup>. In brief, the  
8 MV and SB are both wired. The SB is then stented first with a wire jailed in the MV. The MV is  
9 rewired through the stent struts (through a distal stent strut where possible), following  
10 balloon dilation and MV stenting. Then, second, rewiring the SB from a distal access is  
11 undertaken. A mandatory attempted FKBI is performed. Post-dilations with non-complaint  
12 balloon are undertaken to optimize stent expansion. POT in the stented segment proximal to  
13 the bifurcation is recommended.

14 **Provisional stenting technique.** PS is defined as a stent implantation in the MV with the  
15 jailed wire or jailed balloon protecting the SB<sup>14,15</sup>, followed by kissing balloon dilatation if  
16 there is at least one of the following: > type B dissection and thrombolysis in myocardial  
17 infarction (TIMI) flow < 3 at the ostial SB<sup>5</sup>. An additional stent is required for the SB if any of  
18 the following issues are observed after kissing balloon inflation: > type B dissection or TIMI  
19 flow < 3. POT is also recommended after MV stenting.

20 **Intracoronary imaging.** Intracoronary imaging tools, such as intravascular ultrasound  
21 (IVUS) or optical coherence tomography (OCT), are at the discretion of the operators.

22 **Study stents.** Stents for all implanted lesions are drug-eluting stents (DESSs), including  
23 Firebird-2, or Firehawk (Microport Co., Shanghai, China); EXCEL (Jiwei Co., Shandong,  
24 China); BuMA stent (Sino Medical, Tianjin, China); Partner or Nano (Lepu Med, Beijing,  
25 China); Xience or Xience Prime (Abbott Vascular, Santa Clara, California); and Endeavor  
26 Resolute or Endeavor Integrity (Medtronic, Minneapolis, Minnesota).

27 **Medication.** All patients in the trial are treated with dual antiplatelet therapy for at least  
28 one year, according to contemporary guidelines and local practice. A loading dose of aspirin

1 (300 mg) and clopidogrel (300 mg), or ticagrelor 180 mg) is recommended at least 6 hours  
2 before the PCI procedure. Heparin or an alternative antithrombotic agent (such as  
3 bivalirudin) must be used during the procedure to maintain an activated clotting time  
4 (ACT) >280 seconds. After the PCI, a lifelong dosage of aspirin at 100 mg/d will be  
5 prescribed. The duration of clopidogrel treatment with 75 mg/d (or ticagrelor with 90 mg  
6 twice a day) is at least 12 months.

7  
8 **Biomarker assessment.** Total creatine kinase (CK), CK-myocardial-band isoenzyme (MB),  
9 and troponin T/I are dynamically measured before the procedure and until 72 h  
10 post-procedure.

## 11 12 **Study endpoints**

13 The primary endpoint in the present trial is TLF at 12 months after the indexed procedure,  
14 as defined by the composite of cardiac death, target vessel MI, and clinically driven TLR. The  
15 major secondary endpoints include all causes of death, MI, target-vessel revascularization  
16 (TVR), in-stent restenosis, stroke, and each individual component of the primary endpoints.  
17 The safety endpoint is the risk of Academic Research Consortium (ARC)-defined stent  
18 thrombosis. Other endpoints are listed in [Table 3](#). Detailed definitions of the study endpoints  
19 are described in the supplemental material.

20 All endpoints are site-reported in an electronic web-based capture system with the  
21 additional submission of supporting medical documents. All clinical events are assessed by  
22 an independent committee that was blinded to the study.

## 23 24 **Follow-up**

25 After hospital discharge, clinical follow-up is performed with visits (preferred) or telephone  
26 contact at 1-, 6-, and 12-month. Follow-up will be continued annually until 5 years after the  
27 index procedure. An angiographic follow-up will be encouraged for all patients, and it will be

1 conducted 13 months after the index procedure, unless clinically indicated earlier. An  
2 independent committee that is blinded to the study assesses all clinical events.

3

#### 4 **Angiographic analysis**

5 Quantitative coronary angiographic (QCA) analysis at baseline, post-procedure and  
6 follow-up is performed by the QCA-laboratories at the Nanjing Heart Center. The images are  
7 analyzed by two experienced technicians who are blinded to the study design, with an inter-  
8 and intra-observer variability under 5% (Kappa test).

9 Basic angiograms for all lesions should consist of at least injections after intracoronary  
10 injection of 100-200 µg of nitroglycerin. A bifurcation-view must be gained for all patients;  
11 there should be an angulation difference between the two baseline angiograms of at least  
12 30°. The diagnostic/guiding catheter should be well visible, near the center of the  
13 angiogram and filled with dye. The index lesions should be well visible, near the center of  
14 the angiogram and shown without foreshortening. Between the pre- and post-angiograms,  
15 all balloon inflations and stent implantations should be documented by short cine-runs.

16

#### 17 **Statistical analysis**

18 All analyses will be performed on the intent-to-treat (ITT) population, defined as all patients  
19 randomized, regardless of the treatment actually received. The primary variable is time from  
20 randomization to first occurrence of any event from the TLF. From previous studies, we  
21 hypothesized that the rate of a 1-year TLF would be 15% in the systematic two-stent  
22 technique group and 25% in the provisional stenting group. Accordingly, a total sample size  
23 of 600 is needed to detect a power of 0.8 (Type II error = 0.2,  $\alpha = 0.05$ , 2-tailed). Because  
24 of the considerable uncertainty, the enrollment is extended to 660 patients (10%  
25 increment).

26 The distribution of continuous variables will be assessed by the Kolmogorov-Smirnov test.  
27 Categorical variables are expressed as frequencies or percentages and compared by  
28 Chi-square statistics or Fisher's exact test. Continuous variables are summarized as the

1 means  $\pm$  standard deviation (SD) or median and compared using Students' t-test (for normal  
2 data) and Mann-Whitney U test (for non-normally distributed variables). Survival curves  
3 with time-to-event data are generated by the Kaplan-Meier method and compared using the  
4 log-rank test. Comparisons between the two groups will be performed using the Cox  
5 proportional hazard model. A p value  $<0.05$  is considered statistically significant. All  
6 analyses are performed with the use of the statistical program SPSS 24.0 (SPSS Institute Inc,  
7 Chicago, Illinois).

8 The extensive subgroup analysis will be performed to evaluate variation of treatment  
9 effects, as well as a test of interaction with the treatment for each subgroup variable. The  
10 sub studies of clinical factors include age (age  $> 75$  years old), sex, diabetes mellitus,  
11 hyperlipidemia, hypertension, current smoking, acute coronary syndrome, cardiac  
12 dysfunction (left ventricular ejection fraction  $< 40\%$ ), and renal insufficiency (estimated  
13 glomerular filtration rate  $< 60$  ml/min/1.73 m<sup>2</sup>). In addition, the sub studies of angiographic  
14 and procedural factors include an unprotected distal left main bifurcation lesion, the use of  
15 IVUS, and complete revascularization. Therefore, there are a total of 12 prespecified  
16 subgroup analyses to explore the consistency of effects on two-stent techniques for complex  
17 bifurcation lesions.

### 18 **Ethics and dissemination**

19 The study is performed in accordance with the Declaration of Helsinki and International  
20 Conference on Harmonization of Good Clinical Practices. The study protocol and informed  
21 consent have been reviewed and approved by the Institutional Review Board of Nanjing  
22 First Hospital (KY20141128-01-KS-01, in the [supplemental material](#)), and accepted by each  
23 participating center. Written informed consent for participation in the trial was obtained  
24 from all enrolled patients. Dissemination of the results will include conference presentations  
25 and publications in peer-reviewed journals.

### 26 **Trial organization**

1 The trial was designed by the principal investigator (PI) and the executive committee. The  
2 executive committee members are also responsible for reporting the results, and drafting  
3 the manuscripts. The executive committee, together with the steering committee, the data  
4 and safety monitoring committee, and the independent endpoints adjudication committee  
5 are involved in the present trial.

6 All centers with experience in two-stent techniques (including DK crush and culotte) can  
7 participate in the study. Details about trial organization are listed in the [supplemental](#)  
8 [material](#).

## 10 Discussion

11 Several randomized studies have demonstrated that the PS technique using a jailed wire in  
12 the SB is the gold standard treatment for the majority of bifurcation lesions<sup>1-6</sup>; however, the  
13 bifurcation lesions enrolled in these studies were not all true bifurcation lesions. They were  
14 either moderate narrow or focused lesions at the SB ostium. The DKCRUSH II trial<sup>7</sup>  
15 demonstrated that the two-stent technique using a DK crush was associated with a lower  
16 rate of TVR in true coronary bifurcation lesions with an SB lesion length of 15 mm,  
17 compared with PS. A meta-analysis also showed that the two-stent technique remained an  
18 optional treatment for true bifurcation lesions with a large SB<sup>16</sup>. In addition, the consensus  
19 of the European Bifurcation Club<sup>17</sup> was that true bifurcations with a large SB and ostial  
20 disease extending more than 5 mm from the carina are likely to require two-stent  
21 techniques. Therefore, a novel bifurcation classification is needed to identify which  
22 bifurcation lesions should be treated with two-stent techniques instead of PS.

23 A practical and easy-to-use classification was proposed in the DEFINITION registry by  
24 Shao-Liang Chen<sup>9</sup>, which included 2 major criteria and 6 minor criteria. According to the  
25 newly established criteria, 70% exhibited simple bifurcation lesions, and the remaining 30%  
26 were classified as CBLs in 3660 patients with true coronary bifurcation lesions (Medina  
27 1,1,1 and 0,1,1) and an SB diameter  $\geq 2.5$  mm by visual estimation. As was expected, the  
28 two-stent technique did not show any benefits over PS for the simple bifurcation lesions.



1  
2  
3 1 However, for CBLs, two-stent techniques were associated with less in-hospital mortality and  
4  
5 2 one-year MACE than PS. This important finding will be further verified in the randomized  
6  
7 3 DEFINITION- II trial.

8  
9 4 Left main (LM) bifurcation lesions are unique bifurcation lesions. The diameter of the SB is  
10  
11 5 bigger, and the bifurcation angle is also larger compared with that of a non-LM bifurcation.  
12  
13 6 Culotte stenting with bare metal stents has been largely abandoned because of high  
14  
15 7 restenosis rates. Since the introduction of DESs, culotte stenting has regained its  
16  
17 8 popularity. Murasato reported restriction of the stent expansion such as a “napkin ring” in  
18  
19 9 culotte stenting, using close-cell design stents<sup>18</sup>. In our bench study, even using open-cell  
20  
21 10 design stents in T type bifurcations, significant stent under expansion was revealed in  
22  
23 11 culotte stenting, in contrast to DK crush<sup>19</sup>. The DKCRUSH-III trial confirmed that DK crush  
24  
25 12 was associated with a lower TLR and stent thrombosis for LM bifurcation, compared with  
26  
27 13 culotte stenting at 3-year follow-up<sup>10,20</sup>. Considering the shortages of culotte stenting, we  
28  
29 14 strongly recommend the use of culotte stenting in non-LM bifurcation instead of LM  
30  
31 15 bifurcations. PS with a jailed balloon is a safer alternative than a jailed wire to protect the SB,  
32  
33 16 especially for a high risk of SB occlusion after MV stenting<sup>14,15</sup>. Given that CBLs will be  
34  
35 17 enrolled in the study if a patient is randomized into the PS group, either the use of a jailed  
36  
37 18 balloon or a jailed wire will be allowed at the discretion of the operators.  
38  
39 19

## 40 **Conclusions**

41 21 Strategies for coronary bifurcation lesions should be individualized. PS is the default  
42  
43 22 approach for simple bifurcation lesions. The DEFINITION II study is investigating whether  
44  
45 23 systematic two-stent technique will be superior to PS in CBLs, regarding the incidence of  
46  
47 24 TLF at 12 months.

48 25  
49  
50 26  
51  
52  
53  
54  
55  
56  
57  
58  
59  
60



1 **Table 1. Criteria of complex bifurcation lesions**

| Criteria                                               | Lesion characteristics                                                     |
|--------------------------------------------------------|----------------------------------------------------------------------------|
| Major 1                                                | Distal LM bifurcation: SB-DS $\geq 70\%$ and SB lesion length $\geq 10$ mm |
| Major 2                                                | Non-LM bifurcation: SB-DS $\geq 90\%$ and SB lesion length $\geq 10$ mm    |
| Minor 1                                                | Moderate to severe calcification                                           |
| Minor 2                                                | Multiple lesions                                                           |
| Minor 3                                                | Bifurcation angle $< 45^\circ$ or $> 70^\circ$                             |
| Minor 4:                                               | Main vessel RVD $< 2.5$ mm                                                 |
| Minor 5                                                | Thrombus-containing lesions                                                |
| Minor 6                                                | MV lesion length $\geq 25$ mm                                              |
| Major 1 + any 2 minor 1–6 = complex bifurcation lesion |                                                                            |
| Major 2 + any 2 minor 1–6 = complex bifurcation lesion |                                                                            |

2

3

1 **Table 2 Inclusion and exclusion criteria**

| <b>Inclusion Criteria:</b> |                                                                                                                                                                    |
|----------------------------|--------------------------------------------------------------------------------------------------------------------------------------------------------------------|
| 1.                         | Provision of informed consent prior to any study specific procedures;                                                                                              |
| 2.                         | Men and women 18 years and older;                                                                                                                                  |
| 3.                         | Established indication for PCI according to the guidelines of American Heart Association and American College of Cardiology;                                       |
| 4.                         | Native coronary lesion suitable for drug-eluting stent placement;                                                                                                  |
| 5.                         | True bifurcation lesions (Medina 0,1,1/1,1,1 /1,0,1);                                                                                                              |
| 6.                         | Reference vessel diameter in side branch $\geq 2.5$ mm by visual estimation.                                                                                       |
| <b>Exclusion Criteria:</b> |                                                                                                                                                                    |
| 1.                         | Pregnancy or breast-feeding mother;                                                                                                                                |
| 2.                         | Co-morbidity with an estimated life expectancy of < 50% at 12 months;                                                                                              |
| 3.                         | Scheduled major surgery in the next 12 months;                                                                                                                     |
| 4.                         | Inability to follow the protocol and comply with follow-up requirements or any other reason that the investigator feels would place the patient at increased risk; |
| 5.                         | Previous enrolment in this study or treatment with an investigational drug or device under another study protocol in the past 30 days;                             |
| 6.                         | Known allergy to ticagrelor clopidogrel, or aspirin, history of major hemorrhage (intracranial, gastrointestinal, etc.);                                           |
| 7.                         | Chronic total occlusion lesion in either LAD, or LCX or RCA not re-canalized;                                                                                      |
| 8.                         | Severe calcification needing rotational atherectomy;                                                                                                               |
| 9.                         | Patient with STEMI (within 24-hour from the onset of chest pain to admission).                                                                                     |

2  
3  
4

1 **Table 3. Study endpoints.**

|                                                                                                                                                                                                                                                                                                                                                                                                                                                                                                                                                                                                                                                                    |
|--------------------------------------------------------------------------------------------------------------------------------------------------------------------------------------------------------------------------------------------------------------------------------------------------------------------------------------------------------------------------------------------------------------------------------------------------------------------------------------------------------------------------------------------------------------------------------------------------------------------------------------------------------------------|
| <p>Primary endpoint</p> <ul style="list-style-type: none"> <li>● Target lesion failure: composite of cardiac death, target vessel myocardial infarction (MI), and target lesion revascularization (TLR) at 12 months</li> </ul>                                                                                                                                                                                                                                                                                                                                                                                                                                    |
| <p>Secondary endpoints</p> <ul style="list-style-type: none"> <li>● All-cause death: cardiac death, non-cardiac death</li> <li>● MI: periprocedural MI, spontaneous MI</li> <li>● Revascularization: TLR, target vessel revascularization (TVR)</li> <li>● Stroke: ischemic stroke, hemorrhagic stroke</li> <li>● Combined endpoint of all-cause death, MI, TVR</li> <li>● In-stent restenosis</li> <li>● Other outcome parameters: NYHA functional class, Braunwald class, net gain of lumen diameter, contrast volume, procedural time, devices consumed during indexed procedure, X-ray exposure time, X-ray dose, DAP-total, DAP-record, DAP-fluoro</li> </ul> |
| <p>Safety endpoints</p> <ul style="list-style-type: none"> <li>● Stent thrombosis</li> <li>● Bleeding complications</li> </ul>                                                                                                                                                                                                                                                                                                                                                                                                                                                                                                                                     |

2

3

4

## 1 Author affiliations

- 2 <sup>1</sup>Department of Cardiology, Nanjing First Hospital, Nanjing Medical University, Nanjing,  
3 China;
- 4 <sup>2</sup>Department of Cardiology, The General Hospital of Shenyang Military, Shenyang, China;
- 5 <sup>3</sup>Department of Cardiology, Nanjing Heart Center, Nanjing, China;
- 6 <sup>4</sup>Department of Cardiology, Xijing Hospital, 4th Military Medical University, Xi'an, China;
- 7 <sup>5</sup>Medicine Siriraj Hospital, Bangkok, Thailand;
- 8 <sup>6</sup>Department of Cardiology, Taicang People's Hospital, Taicang, China;
- 9 <sup>7</sup>Department of Cardiology, Anhui Provincial Hospital, Hefei, China;
- 10 <sup>8</sup>Department of Cardiology, Huainan Eastern Hospital, Huainan, China;
- 11 <sup>9</sup>Department of Cardiology, Yixin People's Hospital, Yixin, China;
- 12 <sup>10</sup>Department of Cardiology, Cangzhou Central Hospital, Cangzhou, China;
- 13 <sup>11</sup>Binawaluya Cardiac Center, Jakarta, Indonesia;
- 14 <sup>12</sup>Guangzhou Red Cross Hospital, Guangzhou, China;
- 15 <sup>13</sup>Shanghai Ruijin Hospital, Shanghai, China;
- 16 <sup>14</sup>Tongji Hospital, Tongji Medical College, Huazhong University of Science and Technology,  
17 Wuhan, China;
- 18 <sup>15</sup>Medistra Hospital, University of Indonesia, Jakarta, Indonesia;
- 19 <sup>16</sup>Department of Cardiology, Gansu Provincial Hospital, Lanzhou, China;
- 20 <sup>17</sup>Department of Cardiology, Beijing Anzhen Hospital, Capital Medical University, Beijing,  
21 China;
- 22 <sup>18</sup>Department of Cardiology, Changshu First People's Hospital, Changshu, China;
- 23 <sup>19</sup>Cheng-Hsin General Hospital, Taipei, China;
- 24 <sup>20</sup>Zhangjiagang First People's Hospital, ZhangjiaGang, China;
- 25 <sup>21</sup>Changzhou Hospital of Traditional Chinese Medicine, Changzhou, China;
- 26 <sup>22</sup>Jiangxi Provincial People's Hospital, Nanchang, China;
- 27 <sup>23</sup>Bangkok General Hospital, Bangkok, Thailand;
- 28 <sup>24</sup>Xia'Men Zhongshan Hospital, Xia'Men, China;
- 29 <sup>25</sup>Huainan First People's Hospital, Huainan, China;
- 30 <sup>26</sup>Jintan People's Hospital, Jintan, China;
- 31 <sup>27</sup>Wuxi Third People 's Hospital, Wuxi, China;
- 32 <sup>28</sup>Daqing Oil General Hospital, Daqing, China;
- 33 <sup>29</sup>The Second Hospital of Shandong University, Ji'nan, China;
- 34 <sup>30</sup>Xinyang Central Hospital, Xinyang, China;
- 35 <sup>31</sup>Fujian Union Hospital, Fuzhou, China;
- 36 <sup>32</sup>Jilin Heart Hospital, Changchun, China;
- 37 <sup>33</sup>Otamendi Hospital, Buenos Aires, Argentina;
- 38 <sup>34</sup>Chuzhou First People 's Hospital, Chuzhou, China;
- 39 <sup>35</sup>Huainan Xinhua Hospital, Huainan, China;
- 40 <sup>36</sup>Bangplee Hospital, Bangkok, Thailand;
- 41 <sup>37</sup>Huai'an Second People's Hospital, Huai'an, China;
- 42 <sup>38</sup>Qingdao Fuwai Hospital, Qingdao, China;

1  
2  
3 1 <sup>39</sup>The Affiliated Hospital of Guangdong Medical University, Guangdong, China;

4 2 <sup>40</sup>University of Turin, Turin, Italy;

5 3 <sup>41</sup>The Affiliated Hospital of Xuzhou Medical University, Xuzhou, China;

6 4 <sup>42</sup>Xuyi People's Hospital, Xuyi, China;

7 5 <sup>43</sup>Wuxi Huishan District People's Hospital, Wuxi, China;

8 6 <sup>44</sup>Anqing First People's Hospital, Anqing, China;

9 7 <sup>45</sup>Liyang Hospital of Traditional Chinese Medicine, Liyang, China;

10 8 <sup>46</sup>Lianyang Hospital of Traditional Chinese Medicine, Lianyang, China;

11 9  
12 10 **Acknowledgements** The authors appreciate the contributions of Ling Lin, Hai-Mei Xu, and  
13 11 Ying-Ying Zhao to data collection. They also acknowledge Bao-Xiang Duan, Lin Lin, Ji Yong,  
14 12 and Linda Lison for their contribution in the data and safety monitoring.

### 15 13 16 14 **Contributors**

17 15 SLC made substantial contributions to study conception and design, and to the drafting and  
18 16 critical revision of the manuscript. JJZ and XFG wrote the first draft. YLH, JK, LT, and ZG  
19 17 provided data management and statistical expertise. DT, SL, LKM, FL, SY, JZ, MM, LL, RYZ,  
20 18 HSZ, TS, PX, ZNJ, LH, WHY, XSQ, QHL, LH, CP, YW, LJL, LZ, XMW, SYW, QHL, JQY, LLC, FL, AER,  
21 19 LMZ, SQD, KV, YSZ, MYY, CC, IS, YX, YLT, ZLS, QJ, YHZ, XW, FY, NLT, SL, and ZZL provided  
22 20 comments and suggestions in critical revision of the article. All authors approved the final  
23 21 version of the article.

24 22  
25 23 **Funding** The present trial was support by National Science Foundation of China (NSFC  
26 24 81270191, NSFC 91439118) and Health and Family Planning Commission Foundation of  
27 25 Nanjing (YKK16124)

28 26  
29 27 **Competing interests** None declared.

30 28  
31 29 **Patient consent** Obtained.

32 30  
33 31 **Ethics approval** The study protocol and informed consent have been reviewed and  
34 32 approved by the Institutional Review Board of Nanjing First Hospital  
35 33 (KY20141128-01-KS-01), and accepted by each participating center. Version of this protocol  
36 34 was 1.2, and was approved on March 9, 2016 (in the supplemental material).

37 35  
38 36 **Provenance and peer review** Not commissioned; externally peer reviewed.

39 37  
40 38 **Open Access** This is an Open Access article distributed in accordance with the  
41 39 Creative Commons Attribution Non Commercial (CC BY-NC 4.0) license, which permits  
42 40 others to distribute, remix, adapt, build upon this work non-commercially, and license their  
43 41 derivative works on different terms, provided the original work is properly cited and the use  
44 42 is non-commercial. See: <http://creativecommons.org/licenses/by-nc/4.0/>

1  
2  
3 **1 Figure legend**

4 **2 Figure 1** Flowchart of study design.

5  
6 3 SB: side branch; RVD: reference vessel diameter; DS: diameter stenosis; LMd: left main distal  
7  
8 4 bifurcation; MV: main vessel; PS: provisional stenting; TLF: target lesion failure; TV-MI:  
9  
10 5 target-vessel myocardial infarction; TLR: target lesion revascularization.  
11  
12 6

13  
14  
15  
16  
17  
18  
19  
20  
21  
22  
23  
24  
25  
26  
27  
28  
29  
30  
31  
32  
33  
34  
35  
36  
37  
38  
39  
40  
41  
42  
43  
44  
45  
46  
47  
48  
49  
50  
51  
52  
53  
54  
55  
56  
57  
58  
59  
60

For peer review only

## Reference

1. Colombo A, Bramucci E, Sacca S, et al. Randomized study of the crush technique versus provisional side-branch stenting in true coronary bifurcations: the CACTUS (Coronary Bifurcations: Application of the Crushing Technique Using Sirolimus-Eluting Stents) Study. *Circulation* 2009;119(1):71-78.
2. Ferenc M, Gick M, Kienzle RP, et al. Randomized trial on routine vs. provisional T-stenting in the treatment of de novo coronary bifurcation lesions. *Eur Heart J* 2008;29(23):2859-2867.
3. Hildick-Smith D, de Belder AJ, Cooter N, et al. Randomized trial of simple versus complex drug-eluting stenting for bifurcation lesions: the British Bifurcation Coronary Study: old, new, and evolving strategies. *Circulation* 2010;121(10):1235-1243.
4. Pan M, de Lezo JS, Medina A, et al. Rapamycin-eluting stents for the treatment of bifurcated coronary lesions: a randomized comparison of a simple versus complex strategy. *Am Heart J* 2004;148(5):857-864.
5. Steigen TK, Maeng M, Wiseth R, et al. Randomized study on simple versus complex stenting of coronary artery bifurcation lesions: the Nordic bifurcation study. *Circulation* 2006;114(18):1955-1961.
6. Colombo A, Moses JW, Morice MC, et al. Randomized study to evaluate sirolimus-eluting stents implanted at coronary bifurcation lesions. *Circulation* 2004;109(10):1244-1249.
7. Chen SL, Santoso T, Zhang JJ, et al. A randomized clinical study comparing double kissing crush with provisional stenting for treatment of coronary bifurcation lesions: results from the DKCRUSH-II (Double Kissing Crush versus Provisional Stenting Technique for Treatment of Coronary Bifurcation Lesions) trial. *J Am Coll Cardiol* 2011;57(8):914-920.
8. Lin QF, Luo YK, Lin CG, Peng YF, Zhen XC, Chen LL. Choice of stenting strategy in true coronary artery bifurcation lesions. *Coron Artery Dis* 2010;21(6):345-351.
9. Chen SL, Sheiban I, Xu B, et al. Impact of the complexity of bifurcation lesions treated with drug-eluting stents: the DEFINITION study (Definitions and impact of complex bifurcation lesions on clinical outcomes after percutaneous coronary intervention using drug-eluting stents). *JACC Cardiovasc Interv* 2014;7(11):1266-1276.
10. Chen SL, Xu B, Han YL, et al. Comparison of double kissing crush versus Culotte stenting for unprotected distal left main bifurcation lesions: results from a multicenter, randomized, prospective DKCRUSH-III study. *J Am Coll Cardiol* 2013;61(14):1482-1488.
11. Chen SL, Ye F, Zhang JJ, et al. [DK crush technique: modified treatment of bifurcation lesions in coronary artery]. *Chin Med J (Engl)* 2005;118(20):1746-1750.
12. Chen SL, Zhang JJ, Ye F, et al. Study comparing the double kissing (DK) crush with classical crush for the treatment of coronary bifurcation lesions: the DKCRUSH-1 Bifurcation Study with drug-eluting stents. *Eur J Clin Invest* 2008;38(6):361-371.
13. Chevalier B, Glatt B, Royer T, Guyon P. Placement of coronary stents in bifurcation

- 1 lesions by the "culotte" technique. *Am J Cardiol* 1998;82(8):943-949.
- 2
- 3 14. Depta JP, Patel Y, Patel JS, et al. Long-term clinical outcomes with the use of a
- 4 modified provisional jailed-balloon stenting technique for the treatment of nonleft
- 5 main coronary bifurcation lesions. *Catheter Cardiovasc Interv* 2013;82(5):E637-646.
- 6
- 7 15. Singh J, Patel Y, Depta JP, et al. A modified provisional stenting approach to coronary
- 8 bifurcation lesions: clinical application of the "jailed-balloon technique". *J Interv*
- 9 *Cardiol* 2012;25(3):289-296.
- 10
- 11 16. Gao XF, Zhang YJ, Tian NL, et al. Stenting strategy for coronary artery bifurcation with
- 12 drug-eluting stents: a meta-analysis of nine randomised trials and systematic review.
- 13 *EuroIntervention* 2014;10(5):561-569.
- 14
- 15 17. Stankovic G, Lefevre T, Chieffo A, et al. Consensus from the 7th European Bifurcation
- 16 Club meeting. *EuroIntervention* 2013;9(1):36-45.
- 17
- 18 18. Murasato Y, Hikichi Y, Horiuchi M. Examination of stent deformation and gap
- 19 formation after complex stenting of left main coronary artery bifurcations using
- 20 microfocus computed tomography. *J Interv Cardiol* 2009;22(2):135-144.
- 21
- 22 19. Rab T, Sheiban I, Louvard Y, Sawaya FJ, Zhang JJ, Chen SL. Current Interventions for
- 23 the Left Main Bifurcation. *JACC Cardiovasc Interv* 2017;10(9):849-865.
- 24
- 25 20. Chen SL, Xu B, Han YL, et al. Clinical Outcome After DK Crush Versus Culotte Stenting
- 26 of Distal Left Main Bifurcation Lesions: The 3-Year Follow-Up Results of the
- 27 DKCRUSH-III Study. *JACC Cardiovasc Interv* 2015;8(10):1335-1342.
- 28
- 29
- 30
- 31
- 32
- 33
- 34
- 35
- 36
- 37
- 38
- 39
- 40
- 41
- 42
- 43
- 44
- 45
- 46
- 47
- 48
- 49
- 50
- 51
- 52
- 53
- 54
- 55
- 56
- 57
- 58
- 59
- 60



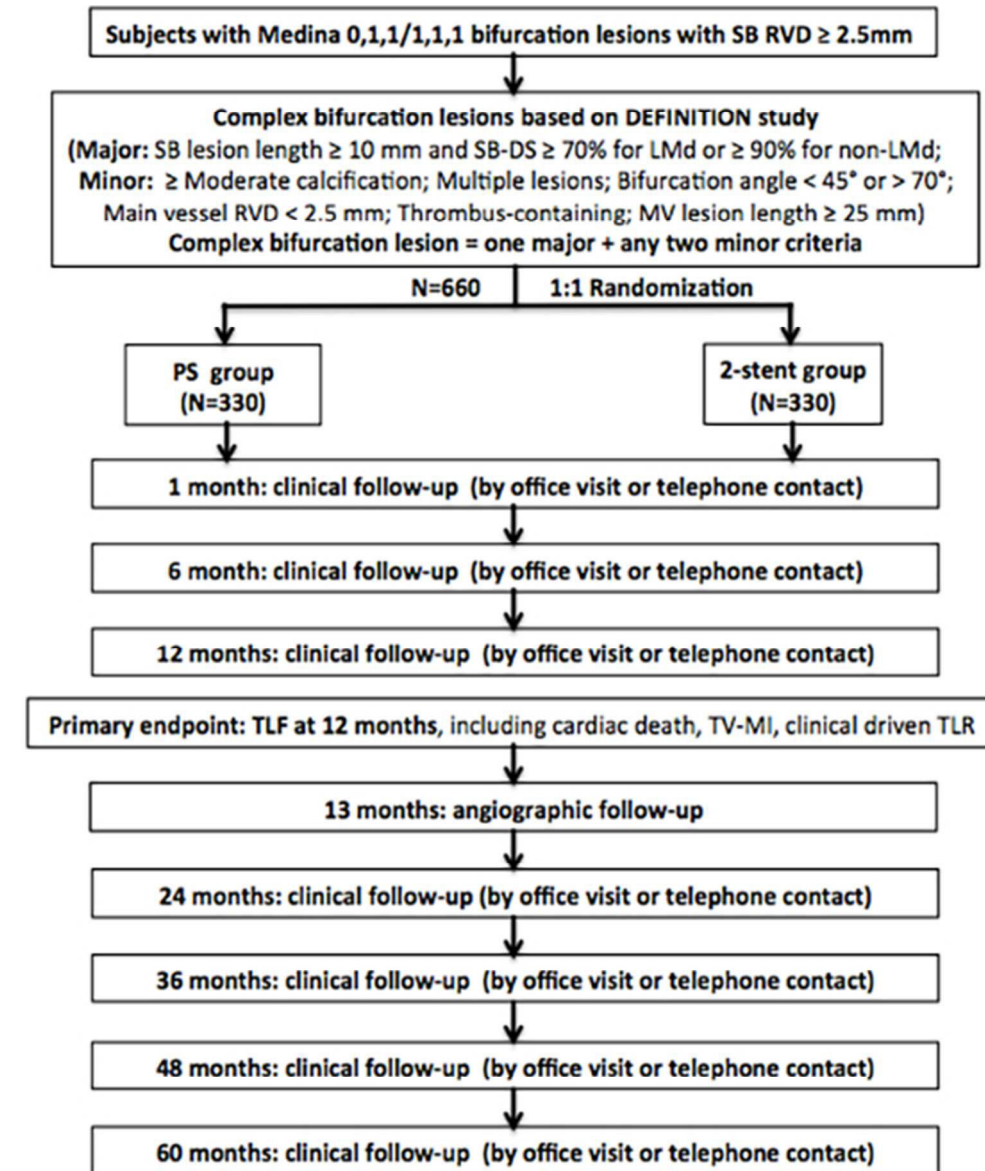

44  
45  
46  
47  
48  
49

Flowchart of study design.

50  
51  
52  
53  
54  
55  
56  
57  
58  
59  
60

50x58mm (300 x 300 DPI)

# Supplemental material

## The treatment effects of systematic two-stent and provisional stenting techniques in patients with complex coronary bifurcation lesions: Rationale and design of a prospective, randomized, and multicenter DEFINITION II Trial

Jun-Jie Zhang,<sup>1</sup> Xiao-Fei Gao,<sup>1</sup> Ya-Ling Han,<sup>2</sup> Jing Kan,<sup>3</sup> Ling Tao,<sup>4</sup> Zhen Ge,<sup>1</sup> Damras Tresukosol,<sup>5</sup> Shu Lu,<sup>6</sup> Li-Kun Ma,<sup>7</sup> Feng Li,<sup>8</sup> Song Yang,<sup>9</sup> Jun Zhang,<sup>10</sup> Muhammad Munawar,<sup>11</sup> Li Li,<sup>12</sup> Rui-Yan Zhang,<sup>13</sup> He-Song Zeng,<sup>14</sup> Teguh Santoso,<sup>15</sup> Ping Xie,<sup>16</sup> Ze-Ning Jin,<sup>17</sup> Leng Han,<sup>18</sup> Wei-Hsian Yin,<sup>19</sup> Xue-Song Qian,<sup>20</sup> Qi-Hua Li,<sup>21</sup> Lang Hong,<sup>22</sup> Chotneparatpat Paiboon,<sup>23</sup> Yan Wang,<sup>24</sup> Li-Jun Liu,<sup>25</sup> Lei Zhou,<sup>26</sup> Xue-Ming Wu,<sup>27</sup> Shang-Yu Wen,<sup>28</sup> Qing-Hua Lu,<sup>29</sup> Jun-Qiang Yuan,<sup>30</sup> Liang-Long Chen,<sup>31</sup> Francesco Lavarra,<sup>32</sup> Alfredo E. Rodríguez,<sup>33</sup> Li-Min Zhou,<sup>34</sup> Shi-Qin Ding,<sup>35</sup> Kitigon Vichairuangthum,<sup>36</sup> Yuan-Sheng Zhu,<sup>37</sup> Meng-Yue Yu,<sup>38</sup> Chan Chen,<sup>39</sup> Imad Sheiban,<sup>40</sup> Yong Xia,<sup>41</sup> Yu-Long Tian,<sup>42</sup> Zheng-Lu Shang,<sup>43</sup> Qing Jiang,<sup>44</sup> Yong-Hong Zhen,<sup>45</sup> Xin Wang,<sup>46</sup> Fei Ye,<sup>1</sup> Nai-Liang Tian,<sup>1</sup> Song Lin,<sup>1</sup> Zhi-Zhong Liu,<sup>1</sup> Shao-Liang Chen,<sup>1,3\*</sup>

Zhang JJ and Gao XF contributed equally to this work.

**\*Correspondence author:** Shao-Liang Chen, Department of cardiology, Nanjing First Hospital, Nanjing Medical University; No. 68 Changle road, 210006 Nanjing, China; Tel & Fax: +86-25-52208048; E-mail: [chmengx@126.com](mailto:chmengx@126.com).

<sup>1</sup>Department of Cardiology, Nanjing First Hospital, Nanjing Medical University, Nanjing, China;

<sup>2</sup>Department of Cardiology, The General Hospital of Shenyang Military, Shenyang, China;

<sup>3</sup>Department of Cardiology, Nanjing Heart Center, Nanjing, China;

<sup>4</sup>Department of Cardiology, Xijing Hospital, 4th Military Medical University, Xi'an, China;

<sup>5</sup>Medicine Siriraj Hospital, Bangkok, Thailand;

<sup>6</sup>Department of Cardiology, Taicang People's Hospital, Taicang, China;

<sup>7</sup>Department of Cardiology, Anhui Provincial Hospital, Hefei, China;

<sup>8</sup>Department of Cardiology, Huainan Eastern Hospital, Huainan, China;

<sup>9</sup>Department of Cardiology, Yixin People's Hospital, Yixin, China;

- 1 <sup>10</sup>Department of Cardiology, Cangzhou Central Hospital, Cangzhou, China;
- 2 <sup>11</sup>Binawaluya Cardiac Center, Jakarta, Indonesia;
- 3 <sup>12</sup>Guangzhou Red Cross Hospital, Guangzhou, China;
- 4 <sup>13</sup>Shanghai Ruijin Hospital, Shanghai, China;
- 5 <sup>14</sup>Tongji Hospital, Tongji Medical College, Huazhong University of Science and Technology, Wuhan, China;
- 6 <sup>15</sup>Medistra Hospital, University of Indonesia, Jakarta, Indonesia;
- 7 <sup>16</sup>Department of Cardiology, Gansu Provincial Hospital, Lanzhou, China;
- 8 <sup>17</sup>Department of Cardiology, Beijing Anzhen Hospital, Capital Medical University, Beijing, China;
- 9 <sup>18</sup>Department of Cardiology, Changshu First People's Hospital, Changshu, China;
- 10 <sup>19</sup>Cheng-Hsin General Hospital, Taipei, China;
- 11 <sup>20</sup>Zhangjiagang First People's Hospital, ZhangjiaGang, China;
- 12 <sup>21</sup>Changzhou Hospital of Traditional Chinese Medicine, Changzhou, China;
- 13 <sup>22</sup>Jiangxi Provincial People's Hospital, Nanchang, China;
- 14 <sup>23</sup>Bangkok General Hospital, Bangkok, Thailand;
- 15 <sup>24</sup>Xia'Men Zhongshan Hospital, Xia'Men, China;
- 16 <sup>25</sup>Huainan First People's Hospital, Huainan, China;
- 17 <sup>26</sup>Jintan People's Hospital, Jintan, China;
- 18 <sup>27</sup>Wuxi Third People 's Hospital, Wuxi, China;
- 19 <sup>28</sup>Daqing Oil General Hospital, Daqing, China;
- 20 <sup>29</sup>The Second Hospital of Shandong University, Ji'nan, China;
- 21 <sup>30</sup>Xinyang Central Hospital, Xinyang, China;
- 22 <sup>31</sup>Fujian Union Hospital, Fuzhou, China;
- 23 <sup>32</sup>Jilin Heart Hospital, Changchun, China;
- 24 <sup>33</sup>Otamendi Hospital, Buenos Aires, Argentina;
- 25 <sup>34</sup>Chuzhou First People 's Hospital, Chuzhou, China;
- 26 <sup>35</sup>Huainan Xinhua Hospital, Huainan, China;
- 27 <sup>36</sup>Bangplee Hospital, Bangkok, Thailand;
- 28 <sup>37</sup>Huai'an Second People's Hospital, Huai'an, China;
- 29 <sup>38</sup>Qingdao Fuwai Hospital, Qingdao, China;
- 30 <sup>39</sup>The Affiliated Hospital of Guangdong Medical University, Guangdong, China;
- 31 <sup>40</sup>University of Turin, Turin, Italy;
- 32 <sup>41</sup>The Affiliated Hospital of Xuzhou Medical University, Xuzhou, China;

<sup>42</sup>Xuyi People's Hospital, Xuyi, China;

<sup>43</sup>Wuxi Huishan District People's Hospital, Wuxi, China;

<sup>44</sup>Anqing First People's Hospital, Anqing, China;

<sup>45</sup>Liyang Hospital of Traditional Chinese Medicine, Liyang, China;

<sup>46</sup>Lianyungang Hospital of Traditional Chinese Medicine, Lianyungang, China;

| Appendix                                                | Page number |
|---------------------------------------------------------|-------------|
| <b>Appendix 1. Definitions of major study endpoints</b> | 4-5         |
| <b>Appendix 2. Trial organization</b>                   | 6-7         |
| <b>Appendix 3. Institutional Review Boards</b>          | 8-11        |
| <b>Appendix 4. SPIRIT 2013 Checklist</b>                | 12-16       |

## Appendix 1. Definitions of major study endpoints

| Endpoint              | Definition                                                                                                                                                                                                                                                                                                                                                                                                                                                                                                                                                                                                                                                                                                                                                                                                                                                                                                                                                                                                                                                                                                                                                                                                                                                                                                                                                                                                                                                                                                                                                                                                       |
|-----------------------|------------------------------------------------------------------------------------------------------------------------------------------------------------------------------------------------------------------------------------------------------------------------------------------------------------------------------------------------------------------------------------------------------------------------------------------------------------------------------------------------------------------------------------------------------------------------------------------------------------------------------------------------------------------------------------------------------------------------------------------------------------------------------------------------------------------------------------------------------------------------------------------------------------------------------------------------------------------------------------------------------------------------------------------------------------------------------------------------------------------------------------------------------------------------------------------------------------------------------------------------------------------------------------------------------------------------------------------------------------------------------------------------------------------------------------------------------------------------------------------------------------------------------------------------------------------------------------------------------------------|
| Death                 | <ul style="list-style-type: none"> <li>● <b>Cardiovascular death</b> includes sudden cardiac death, death due to acute myocardial infarction (MI), arrhythmia, heart failure, stroke, other cardiovascular causes, or bleeding</li> <li>● <b>Non-cardiovascular death</b> is defined as any death with known cause not of cardiac or vascular cause</li> <li>● All deaths are considered cardiac in origin unless a non-cardiac cause is confirmed clinically or at autopsy.</li> </ul>                                                                                                                                                                                                                                                                                                                                                                                                                                                                                                                                                                                                                                                                                                                                                                                                                                                                                                                                                                                                                                                                                                                          |
| Myocardial infarction | <p><b>Post-procedure MI:</b> occurrence within 48 hours after PCI</p> <ul style="list-style-type: none"> <li>● Patients with normal baseline CK-MB: the peak CK-MB measured within 48 hours of the procedure rises to <math>\geq 10 \times</math> upper reference limit (URL), or to <math>\geq 5 \times</math> URL with new pathologic Q-waves in at least 2 contiguous leads or new persistent left bundle branch block (LBBB)</li> <li>● Patients with elevated baseline CK-MB in whom the biomarker levels are stable or falling: the CK-MB rises by an absolute increment equal to those levels recommended above from the most recent pre-procedure level</li> </ul> <p><b>Spontaneous MI:</b> occurrence more than 48 hours after PCI</p> <ul style="list-style-type: none"> <li>● The rise of cardiac biomarkers (CK-MB or troponin) <math>&gt; 1x</math> URL, with one of the follows: <ul style="list-style-type: none"> <li>➤ Evidence of prolonged ischemia as demonstrated by prolonged chest pain</li> <li>➤ Ischemic ST-segment changes or new pathological Q waves</li> <li>➤ Angiographic evidence of a flow limiting complication</li> <li>➤ Imaging evidence of new loss of viable myocardium or new regional wall motion abnormality</li> </ul> </li> </ul> <p><b>Target vessel MI:</b> spontaneous MI associated with target vessel (including main vessel [MV] and side branch [SB]), which was identified by electrocardiographic changes or coronary angiography.</p> <p>Each MI will also be classified as ST-segment elevation MI (STEMI) and non-ST-segment elevation MI (NSTEMI)</p> |
| Revascularization     | <p><b>Target lesion revascularization (TLR)</b></p> <ul style="list-style-type: none"> <li>● Repeat revascularization (including PCI and coronary artery bypass grafting) for target lesions (including MV and SB), in the presence of symptoms or objective signs of ischemia</li> </ul> <p><b>Target vessel revascularization (TVR)</b></p> <ul style="list-style-type: none"> <li>● Repeat revascularization (including PCI and coronary artery bypass grafting) for target vessels (including MV and SB), in the presence of symptoms or objective signs of ischemia</li> </ul> <p><b>Target vessel non-target lesion revascularization</b></p> <ul style="list-style-type: none"> <li>● Target vessel non-target lesion consists of a lesion in the epicardial vessel/branch/graft that contains the target lesion; however, this lesion is outside of the target lesion by at least 5 mm distal or proximal to the target lesion determined by quantitative coronary angiography</li> </ul>                                                                                                                                                                                                                                                                                                                                                                                                                                                                                                                                                                                                                |
| Stent thrombosis      | <p>Academic Research Consortium (ARC) classification</p> <p><b>Definite stent thrombosis</b></p> <ul style="list-style-type: none"> <li>● Symptoms suggestive of an acute coronary syndrome and angiographic or pathological confirmation of stent thrombosis</li> </ul>                                                                                                                                                                                                                                                                                                                                                                                                                                                                                                                                                                                                                                                                                                                                                                                                                                                                                                                                                                                                                                                                                                                                                                                                                                                                                                                                         |

|          |                                                                                                                                                                                                                                                                                                                                                                                                                                                                                                                                                                                                                                                                                                                                                                                                                                                                                                                                                                    |
|----------|--------------------------------------------------------------------------------------------------------------------------------------------------------------------------------------------------------------------------------------------------------------------------------------------------------------------------------------------------------------------------------------------------------------------------------------------------------------------------------------------------------------------------------------------------------------------------------------------------------------------------------------------------------------------------------------------------------------------------------------------------------------------------------------------------------------------------------------------------------------------------------------------------------------------------------------------------------------------|
|          | <p><b>Probable stent thrombosis</b></p> <ul style="list-style-type: none"> <li>● Unexplained death within 30 days or target vessel myocardial infarction without angiographic confirmation of stent thrombosis</li> </ul> <p><b>Possible stent thrombosis</b></p> <ul style="list-style-type: none"> <li>● Any unexplained death after 30 days</li> </ul> <p>Stent thrombosis will also be classified as acute stent thrombosis (0–24 hours after PCI), subacute stent thrombosis (24 hours–30 days), late stent thrombosis (31 days–1 year), or very late stent thrombosis (&gt;1 year)</p>                                                                                                                                                                                                                                                                                                                                                                       |
| Bleeding | <p>Bleeding Academic Research Consortium (BARC) classification</p> <p><b>Type 0:</b> no bleeding</p> <p><b>Type 1:</b> bleeding that is not actionable and does not cause the patient to seek unscheduled performance of studies, hospitalization, or treatment</p> <p><b>Type 2:</b> any overt, actionable sign of hemorrhage that does not fit the criteria for 3, 4, or 5</p> <p><b>Type 3:</b></p> <ul style="list-style-type: none"> <li>● <b>Type 3a:</b> overt bleeding with hemoglobin drop of 3 to 5 g/dl; any transfusion with overt bleeding</li> <li>● <b>Type 3b:</b> overt bleeding with hemoglobin drop <math>\geq</math> 5g/dl; cardiac tamponade; bleeding requiring surgical intervention for control; bleeding requiring intravenous vasoactive agents</li> <li>● <b>Type 3c:</b> intracranial hemorrhage; intraocular bleeding compromising vision</li> </ul> <p><b>Type 4:</b> CABG-related bleeding</p> <p><b>Type 5:</b> fatal bleeding</p> |
| Stroke   | <p>Global or focal cerebral, spinal cord, or retinal injury resulting in acute neurological dysfunction and was further classified into ischemic and hemorrhagic stroke</p>                                                                                                                                                                                                                                                                                                                                                                                                                                                                                                                                                                                                                                                                                                                                                                                        |

## Appendix 2. Trial organization

### Principal investigator:

Shao-Liang Chen, Nanjing First Hospital, Nanjing Medical University

### Steering committee:

Shao-Liang Chen, Gregg W Stone, Bo Xu , Imad Sheiban, Ya-ling Han

### Core laboratory:

Nanjing Heart Center

### Study statistician:

School of Public Health, Nanjing Medical University

### Data and safety monitoring committee:

Bao-Xiang Duan, Lin Lin, Ji Yong, Linda Lison

### Participating hospitals and collaborators of DEFINITION || trial:

1. Nanjing First Hospital, Nanjing Medical University, Nanjing, China;
2. The General Hospital of Shenyang Military, Shenyang, China;
3. Xijing Hospital, 4th Military Medical University, Xi'an, China;
4. Medicine Siriraj Hospital, Bangkok, Thailand;
5. Taicang People's Hospital, Taicang, China;
6. Anhui Provincial Hospital, Hefei, China;
7. Huainan Eastern Hospital, Huainan, China;
8. Yixin People's Hospital, Yixin, China;
9. Cangzhou Central Hospital, Cangzhou, China;
10. Binawaluya Cardiac Center, Jakarta, Indonesia;
11. Guangzhou Red Cross Hospital, Guangzhou, China;
12. Shanghai Ruijin Hospital, Shanghai, China;
13. Tongji Hospital, Tongji Medical College, Huazhong University of Science and Technology, Wuhan, China;
14. Medistra Hospital, University of Indonesia, Jakarta, Indonesia;
15. Gansu Provincial Hospital, Lanzhou, China;
16. Beijing Anzhen Hospital, Capital Medical University, Beijing, China;
17. Changshu First People's Hospital, Changshu, China;
18. Cheng-Hsin General Hospital, Taipei, China;
19. Zhangjiagang First People's Hospital, ZhangjiaGang, China;
20. Changzhou Hospital of Traditional Chinese Medicine, Changzhou, China;
21. Jiangxi Provincial People's Hospital, Nanchang, China;
22. Bangkok General Hospital, Bangkok, Thailand;
23. Xia'Men Zhongshan Hospital, Xia'Men, China;
24. Huainan First People's Hospital, Huainan, China;
25. Jintan People's Hospital, Jintan, China;
26. Wuxi Third People 's Hospital, Wuxi, China;
27. Daqing Oil General Hospital, Daqing, China;
28. The Second Hospital of Shandong University, Ji'nan, China;



- 1 29. Xinyang Central Hospital, Xinyang, China;
- 2 30. Fujian Union Hospital, Fuzhou, China;
- 3 31. Jilin Heart Hospital, Changchun, China;
- 4 32. Otamendi Hospital, Buenos Aires, Argentina;
- 5 33. Chuzhou First People 's Hospital, Chuzhou, China;
- 6 34. Huainan Xinhua Hospital, Huainan, China;
- 7 35. Bangle Hospital, Bangkok, Thailand;
- 8 36. Huai'an Second People's Hospital, Huai'an, China;
- 9 37. Qingdao Fuwai Hospital, Qingdao, China;
- 10 38. The Affiliated Hospital of Guangdong Medical University, Guangdong, China;
- 11 39. University of Turin, Turin, Italy;
- 12 40. The Affiliated Hospital of Xuzhou Medical University, Xuzhou, China;
- 13 41. Xuyi People's Hospital, Xuyi, China;
- 14 42. Wuxi Huishan District People's Hospital, Wuxi, China;
- 15 43. Anqing First People's Hospital, Anqing, China;
- 16 44. Liyang Hospital of Traditional Chinese Medicine, Liyang, China;
- 17 45. Lianyungang Hospital of Traditional Chinese Medicine, Lianyungang, China;

peer review only



## Appendix 3. Institutional Review Boards

## 南京市第一医院伦理委员会审批件

编号: KY20141128-01

|         |                                                                         |            |              |       |    |
|---------|-------------------------------------------------------------------------|------------|--------------|-------|----|
| 科研项目名称  | 比较 DK Crush 技术和 Provision Stenting 技术处理复杂分叉病变的前瞻性、随机对照研究 (DEFINATION-2) |            |              |       |    |
| 项目来源    | 申办者发起                                                                   | CRO        | 无            |       |    |
| 申请科室    | 心内科                                                                     | 项目负责人      | 陈绍良          |       |    |
| 审查时间    | 2014 年 11 月 28 日                                                        | 审查地点       | 南京市第一医院多媒体教室 |       |    |
| 审查方式    | <input checked="" type="checkbox"/> 会议审查 <input type="checkbox"/> 快速审查  |            |              |       |    |
| 审批材料    | 详见附件审批材料目录                                                              |            |              |       |    |
| 伦理委员会成员 |                                                                         |            |              |       |    |
| 姓名      | 性别                                                                      | 单位部门       | 职称           | 伦理职务  | 签到 |
| 沈海琦     | 男                                                                       | 南京市第一医院骨科  | 主任医师         | 主任委员  |    |
| 马俊      | 男                                                                       | 南京市第一医院党委  | 政工师          | 副主任委员 |    |
| 陈亚新     | 女                                                                       | 南京医科大学医政学院 | 副教授          | 副主任委员 |    |
| 刘晓东     | 男                                                                       | 中国药科大学     | 教授           | 副主任委员 |    |
| 夏京胜     | 男                                                                       | 江苏三律师事务所   | 律师           | 委员    |    |
| 孙辉      | 男                                                                       | 南京市建邺区信访局  | 公务员          | 委员    |    |
| 姜晟      | 女                                                                       | 南京市第一医院药剂科 | 主任药师         | 委员    |    |
| 张林      | 男                                                                       | 南京市第一医院科技处 | 主治医师         | 委员    |    |
| 朱怀刚     | 男                                                                       | 南京市第一医院教育处 | 主管技师         | 委员    |    |
| 赵太宏     | 男                                                                       | 南京市第一医院医务处 | 副主任医师        | 委员    |    |
| 陈玉红     | 女                                                                       | 南京市第一医院护理部 | 主任护师         | 委员    |    |
| 出席人数    | 应到人数 11 人、实到人数 9 人, 其中: 投票人数 9 人, 回避人数 0 人。                             |            |              |       |    |
| 投票结果    | 同意( 8 ) 修改后同意( 1 ) 修改后重审( 0 ) 不同意( 0 ) 终止或暂停( 0 )                       |            |              |       |    |

1  
2  
3  
4  
5  
6  
7  
8  
9  
10  
11  
12  
13  
14  
15  
16  
17  
18  
19  
20  
21  
22  
23  
24  
25  
26  
27  
28  
29  
30  
31  
32  
33  
34  
35  
36  
37  
38  
39  
40  
41  
42  
43  
44  
45  
46  
47  
48  
49  
50  
51  
52  
53  
54  
55  
56  
57  
58  
59  
60

**审查意见:**

本伦理委员会的职责、人员组成、操作程序及记录遵循 ICH-GCP、中国 GCP 和中国相关法律。根据卫生部《涉及人的生物医学研究伦理审查办法(试行(2007))》、SFDA《药物临床试验质量管理规范(2003)》、《医疗器械临床试验规定(2004)》、《赫尔辛基宣言》和《人体生物医学研究国际道德指南》的伦理原则进行审查。

非同意性意见:  
按审查意见修改后的文件,或对审查意见不同观点的陈述,请提交“复审申请”,方案/知情同意书 请注明新的版本号 and 版本日期,并以下划线方式标注修改部分,报伦理委员会审查,经批准后执行。  
具体修改意见:

同意性意见:  
经本伦理委员会审查,同意按所批准的临床研究方案、知情同意书、招募材料开展本研究。  
请遵循 GCP 原则、遵循伦理委员会批准的方案开展临床研究,保护受试者的健康与权利。  
研究开始前,请申请人完成临床试验注册。  
研究过程中若变更主要研究者,对临床研究方案、知情同意书、招募材料等的任何修改,请申请人提交修正案审查申请。  
发生严重不良事件,请申请人及时提交严重不良事件报告。  
请按照伦理委员会规定的年度跟踪审查频率申请人在截止日期前 1 个月提交研究进展报告  
申办者应当向组长单位伦理委员会提交各中心研究进展的汇总报告,当出现任何可能显著影响试验进行或增加受试者危险的情况时,请申请人及时向伦理委员会提交书面报告。  
研究纳入了不符合纳入标准或符合排除标准的受试者,符合中止试验规定而未让受试者退出研究,给予错误治疗或剂量,给予方案禁止的合并用药等没有遵从方案开展研究的情况,或可能对受试者的权益/健康以及研究的科学性造成不良影响等违背 GCP 原则的情况,请监查员/研究者提交违背方案报告。  
申请人暂停或提前终止临床研究,请及时提交暂停/终止研究报告。完成临床研究,请申请人提交结题报告。  
具体审查意见:

---

跟踪审查频率:  半年  一年  其他

本批件有效期为1年(自批准之日起),逾期未实施的,则自行废止。

联系电话: 025-52271039

**审批结论**

同意() 修改后同意( ) 修改后重审( ) 不同意( ) 终止或暂停( )

主任委员(签名): 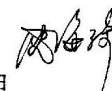  
2014年1月28日

## 南京市第一医院伦理委员会快速审批件

编号: KY20141128-01-KS-01

|                                                                                                                                                                                              |                                                                                                                    |       |     |
|----------------------------------------------------------------------------------------------------------------------------------------------------------------------------------------------|--------------------------------------------------------------------------------------------------------------------|-------|-----|
| 科研项目名称                                                                                                                                                                                       | 比较双支架术和必要时分支支架术治疗冠状动脉复杂分叉病变的一项前瞻性, 多中心, 随机对照研究 (DEFINATION-2)                                                      |       |     |
| 项目来源                                                                                                                                                                                         | 申办者发起                                                                                                              | CRO   | 无   |
| 申请科室                                                                                                                                                                                         | 心内科                                                                                                                | 项目负责人 | 陈绍良 |
| 审批材料                                                                                                                                                                                         | 1、修正案审查申请表<br>2、研究方案 (版本 1.1, 日期 2015-12-08)<br>3、病例报告表 (版本 1.1, 日期 2015-12-08)<br>4、知情同意书 (版本 1.1, 日期 2015-12-08) |       |     |
| 快审人员签名                                                                                                                                                                                       |                                                                                                                    |       |     |
| 签名                                                                                                                                                                                           |                                                                                                                    |       |     |
| 职务                                                                                                                                                                                           | 主任委员                                                                                                               | 委员    |     |
| 审批结论                                                                                                                                                                                         |                                                                                                                    |       |     |
| 同意( <input checked="" type="checkbox"/> ) 修改后同意( <input type="checkbox"/> ) 不同意( <input type="checkbox"/> ) 终止或暂停( <input type="checkbox"/> )<br>转为会审( <input type="checkbox"/> )<br>说明:<br> |                                                                                                                    |       |     |
| 主任委员或授权人 (签名):                                                                                                                                                                               |                                                                                                                    |       |     |
| 2015年12月26日                                                                                                                                                                                  |                                                                                                                    |       |     |
| 声明                                                                                                                                                                                           | 本伦理委员会的职责、人员组成、操作程序及记录遵循 ICH-GCP、中国 GCP 和中国相关法律。                                                                   |       |     |

## 南京市第一医院伦理委员会快速审批件

编号: KY20141128-01-KS-01

|                                                                                                                                                                                          |                                                                                                                    |                                                                                   |     |
|------------------------------------------------------------------------------------------------------------------------------------------------------------------------------------------|--------------------------------------------------------------------------------------------------------------------|-----------------------------------------------------------------------------------|-----|
| 科研项目名称                                                                                                                                                                                   | 比较双支架术和必要时分支支架术治疗冠状动脉复杂分叉病变的一项前瞻性, 多中心, 随机对照研究 (DEFINATION-2)                                                      |                                                                                   |     |
| 项目来源                                                                                                                                                                                     | 申办者发起                                                                                                              | CRO                                                                               | 无   |
| 申请科室                                                                                                                                                                                     | 心内科                                                                                                                | 项目负责人                                                                             | 陈绍良 |
| 审批材料                                                                                                                                                                                     | 1、修正案审查申请表<br>2、研究方案 (版本 1.2, 日期 2016-02-25)<br>3、病例报告表 (版本 1.2, 日期 2016-02-25)<br>4、知情同意书 (版本 1.2, 日期 2016-02-25) |                                                                                   |     |
| 快审人员签名                                                                                                                                                                                   |                                                                                                                    |                                                                                   |     |
| 签名                                                                                                                                                                                       | 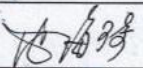                                  |  |     |
| 职务                                                                                                                                                                                       | 主任委员                                                                                                               | 委员                                                                                |     |
| 审批结论                                                                                                                                                                                     |                                                                                                                    |                                                                                   |     |
| 同意( <input checked="" type="checkbox"/> ) 修改后同意( <input type="checkbox"/> ) 不同意( <input type="checkbox"/> ) 终止或暂停( <input type="checkbox"/> )<br>转为会审( <input type="checkbox"/> )<br>说明: |                                                                                                                    |                                                                                   |     |
| 主任委员或授权人 (签名): <br>2016年3月9日                                                                          |                                                                                                                    |                                                                                   |     |
| 声明                                                                                                                                                                                       | 本伦理委员会的职责、人员组成、操作程序及记录遵循 ICH-GCP、中国 GCP 和中国相关法律。                                                                   |                                                                                   |     |

## Appendix 4. SPIRIT 2013 Checklist

SPIRIT 2013 Checklist: Recommended items to address in a clinical trial protocol and related documents\*

| Section/item                      | Item No | Description                                                                                                                                                                                                                                                                              | Addressed on page number |
|-----------------------------------|---------|------------------------------------------------------------------------------------------------------------------------------------------------------------------------------------------------------------------------------------------------------------------------------------------|--------------------------|
| <b>Administrative information</b> |         |                                                                                                                                                                                                                                                                                          |                          |
| Title                             | 1       | Descriptive title identifying the study design, population, interventions, and, if applicable, trial acronym                                                                                                                                                                             | ___ 1 ___                |
| Trial registration                | 2a      | Trial identifier and registry name. If not yet registered, name of intended registry                                                                                                                                                                                                     | ___ 5 ___                |
|                                   | 2b      | All items from the World Health Organization Trial Registration Data Set                                                                                                                                                                                                                 | ___ n/a ___              |
| Protocol version                  | 3       | Date and version identifier                                                                                                                                                                                                                                                              | ___ 16 ___               |
| Funding                           | 4       | Sources and types of financial, material, and other support                                                                                                                                                                                                                              | ___ 16 ___               |
| Roles and responsibilities        | 5a      | Names, affiliations, and roles of protocol contributors                                                                                                                                                                                                                                  | ___ 15-16 ___            |
|                                   | 5b      | Name and contact information for the trial sponsor                                                                                                                                                                                                                                       | ___ 16 ___               |
|                                   | 5c      | Role of study sponsor and funders, if any, in study design; collection, management, analysis, and interpretation of data; writing of the report; and the decision to submit the report for publication, including whether they will have ultimate authority over any of these activities | ___ 16 ___               |
|                                   | 5d      | Composition, roles, and responsibilities of the coordinating centre, steering committee, endpoint adjudication committee, data management team, and other individuals or groups overseeing the trial, if applicable (see Item 21a for data monitoring committee)                         | ___ 9-10 ___             |
| <b>Introduction</b>               |         |                                                                                                                                                                                                                                                                                          |                          |
| Background and rationale          | 6a      | Description of research question and justification for undertaking the trial, including summary of relevant studies (published and unpublished) examining benefits and harms for each intervention                                                                                       | ___ 4 ___                |
|                                   | 6b      | Explanation for choice of comparators                                                                                                                                                                                                                                                    | ___ 4 ___                |
| Objectives                        | 7       | Specific objectives or hypotheses                                                                                                                                                                                                                                                        | ___ 4 ___                |
| Trial design                      | 8       | Description of trial design including type of trial (eg, parallel group, crossover, factorial, single group), allocation ratio, and framework (eg, superiority, equivalence, noninferiority, exploratory)                                                                                | ___ 5 ___                |

### Methods: Participants, interventions, and outcomes

|    |                      |     |                                                                                                                                                                                                                                                                                                                                                                                |             |
|----|----------------------|-----|--------------------------------------------------------------------------------------------------------------------------------------------------------------------------------------------------------------------------------------------------------------------------------------------------------------------------------------------------------------------------------|-------------|
| 1  | Study setting        | 9   | Description of study settings (eg, community clinic, academic hospital) and list of countries where data will be collected. Reference to where list of study sites can be obtained                                                                                                                                                                                             | ___ 5 ___   |
| 2  |                      |     |                                                                                                                                                                                                                                                                                                                                                                                |             |
| 3  |                      |     |                                                                                                                                                                                                                                                                                                                                                                                |             |
| 4  |                      |     |                                                                                                                                                                                                                                                                                                                                                                                |             |
| 5  | Eligibility criteria | 10  | Inclusion and exclusion criteria for participants. If applicable, eligibility criteria for study centres and individuals who will perform the interventions (eg, surgeons, psychotherapists)                                                                                                                                                                                   | ___ 5 ___   |
| 6  |                      |     |                                                                                                                                                                                                                                                                                                                                                                                |             |
| 7  |                      |     |                                                                                                                                                                                                                                                                                                                                                                                |             |
| 8  |                      |     |                                                                                                                                                                                                                                                                                                                                                                                |             |
| 9  | Interventions        | 11a | Interventions for each group with sufficient detail to allow replication, including how and when they will be administered                                                                                                                                                                                                                                                     | ___ 5-6 ___ |
| 10 |                      |     |                                                                                                                                                                                                                                                                                                                                                                                |             |
| 11 |                      |     |                                                                                                                                                                                                                                                                                                                                                                                |             |
| 12 |                      |     |                                                                                                                                                                                                                                                                                                                                                                                |             |
| 13 |                      | 11b | Criteria for discontinuing or modifying allocated interventions for a given trial participant (eg, drug dose change in response to harms, participant request, or improving/worsening disease)                                                                                                                                                                                 | ___ 6 ___   |
| 14 |                      |     |                                                                                                                                                                                                                                                                                                                                                                                |             |
| 15 |                      |     |                                                                                                                                                                                                                                                                                                                                                                                |             |
| 16 |                      |     |                                                                                                                                                                                                                                                                                                                                                                                |             |
| 17 |                      |     |                                                                                                                                                                                                                                                                                                                                                                                |             |
| 18 |                      | 11c | Strategies to improve adherence to intervention protocols, and any procedures for monitoring adherence (eg, drug tablet return, laboratory tests)                                                                                                                                                                                                                              | ___ 6 ___   |
| 19 |                      |     |                                                                                                                                                                                                                                                                                                                                                                                |             |
| 20 |                      |     |                                                                                                                                                                                                                                                                                                                                                                                |             |
| 21 |                      |     |                                                                                                                                                                                                                                                                                                                                                                                |             |
| 22 |                      | 11d | Relevant concomitant care and interventions that are permitted or prohibited during the trial                                                                                                                                                                                                                                                                                  | ___ 6-7 ___ |
| 23 |                      |     |                                                                                                                                                                                                                                                                                                                                                                                |             |
| 24 |                      |     |                                                                                                                                                                                                                                                                                                                                                                                |             |
| 25 | Outcomes             | 12  | Primary, secondary, and other outcomes, including the specific measurement variable (eg, systolic blood pressure), analysis metric (eg, change from baseline, final value, time to event), method of aggregation (eg, median, proportion), and time point for each outcome. Explanation of the clinical relevance of chosen efficacy and harm outcomes is strongly recommended | ___ 7 ___   |
| 26 |                      |     |                                                                                                                                                                                                                                                                                                                                                                                |             |
| 27 |                      |     |                                                                                                                                                                                                                                                                                                                                                                                |             |
| 28 |                      |     |                                                                                                                                                                                                                                                                                                                                                                                |             |
| 29 |                      |     |                                                                                                                                                                                                                                                                                                                                                                                |             |
| 30 |                      |     |                                                                                                                                                                                                                                                                                                                                                                                |             |
| 31 |                      |     |                                                                                                                                                                                                                                                                                                                                                                                |             |
| 32 |                      |     |                                                                                                                                                                                                                                                                                                                                                                                |             |
| 33 | Participant timeline | 13  | Time schedule of enrolment, interventions (including any run-ins and washouts), assessments, and visits for participants. A schematic diagram is highly recommended (see Figure)                                                                                                                                                                                               | ___ 7 ___   |
| 34 |                      |     |                                                                                                                                                                                                                                                                                                                                                                                |             |
| 35 |                      |     |                                                                                                                                                                                                                                                                                                                                                                                |             |
| 36 |                      |     |                                                                                                                                                                                                                                                                                                                                                                                |             |
| 37 | Sample size          | 14  | Estimated number of participants needed to achieve study objectives and how it was determined, including clinical and statistical assumptions supporting any sample size calculations                                                                                                                                                                                          | ___ 8 ___   |
| 38 |                      |     |                                                                                                                                                                                                                                                                                                                                                                                |             |
| 39 |                      |     |                                                                                                                                                                                                                                                                                                                                                                                |             |
| 40 |                      |     |                                                                                                                                                                                                                                                                                                                                                                                |             |
| 41 |                      |     |                                                                                                                                                                                                                                                                                                                                                                                |             |
| 42 | Recruitment          | 15  | Strategies for achieving adequate participant enrolment to reach target sample size                                                                                                                                                                                                                                                                                            | ___ n/a ___ |
| 43 |                      |     |                                                                                                                                                                                                                                                                                                                                                                                |             |
| 44 |                      |     |                                                                                                                                                                                                                                                                                                                                                                                |             |
| 45 |                      |     |                                                                                                                                                                                                                                                                                                                                                                                |             |

#### Methods: Assignment of interventions (for controlled trials)

##### Allocation:

|    |                                  |     |                                                                                                                                                                                                                                                                                                                                                          |           |
|----|----------------------------------|-----|----------------------------------------------------------------------------------------------------------------------------------------------------------------------------------------------------------------------------------------------------------------------------------------------------------------------------------------------------------|-----------|
| 50 | Sequence generation              | 16a | Method of generating the allocation sequence (eg, computer-generated random numbers), and list of any factors for stratification. To reduce predictability of a random sequence, details of any planned restriction (eg, blocking) should be provided in a separate document that is unavailable to those who enrol participants or assign interventions | ___ 5 ___ |
| 51 |                                  |     |                                                                                                                                                                                                                                                                                                                                                          |           |
| 52 |                                  |     |                                                                                                                                                                                                                                                                                                                                                          |           |
| 53 |                                  |     |                                                                                                                                                                                                                                                                                                                                                          |           |
| 54 |                                  |     |                                                                                                                                                                                                                                                                                                                                                          |           |
| 55 |                                  |     |                                                                                                                                                                                                                                                                                                                                                          |           |
| 56 |                                  |     |                                                                                                                                                                                                                                                                                                                                                          |           |
| 57 | Allocation concealment mechanism | 16b | Mechanism of implementing the allocation sequence (eg, central telephone; sequentially numbered, opaque, sealed envelopes), describing any steps to conceal the sequence until interventions are assigned                                                                                                                                                | ___ 5 ___ |
| 58 |                                  |     |                                                                                                                                                                                                                                                                                                                                                          |           |
| 59 |                                  |     |                                                                                                                                                                                                                                                                                                                                                          |           |
| 60 |                                  |     |                                                                                                                                                                                                                                                                                                                                                          |           |



|    |                                                           |     |                                                                                 |             |
|----|-----------------------------------------------------------|-----|---------------------------------------------------------------------------------|-------------|
| 1  | Implement                                                 | 16c | Who will generate the allocation sequence, who will enrol participants, and     | ___ 5 ___   |
| 2  | ation                                                     |     | who will assign participants to interventions                                   |             |
| 3  |                                                           |     |                                                                                 |             |
| 4  | Blinding                                                  | 17a | Who will be blinded after assignment to interventions (eg, trial participants,  | ___ 5,7 ___ |
| 5  | (masking)                                                 |     | care providers, outcome assessors, data analysts), and how                      |             |
| 6  |                                                           |     |                                                                                 |             |
| 7  |                                                           | 17b | If blinded, circumstances under which unblinding is permissible, and            | ___ n/a ___ |
| 8  |                                                           |     | procedure for revealing a participant's allocated intervention during the trial |             |
| 9  |                                                           |     |                                                                                 |             |
| 10 |                                                           |     |                                                                                 |             |
| 11 | <b>Methods: Data collection, management, and analysis</b> |     |                                                                                 |             |
| 12 |                                                           |     |                                                                                 |             |
| 13 | Data                                                      | 18a | Plans for assessment and collection of outcome, baseline, and other trial       | ___ 7 ___   |
| 14 | collection                                                |     | data, including any related processes to promote data quality (eg, duplicate    |             |
| 15 | methods                                                   |     | measurements, training of assessors) and a description of study                 |             |
| 16 |                                                           |     | instruments (eg, questionnaires, laboratory tests) along with their reliability |             |
| 17 |                                                           |     | and validity, if known. Reference to where data collection forms can be         |             |
| 18 |                                                           |     | found, if not in the protocol                                                   |             |
| 19 |                                                           |     |                                                                                 |             |
| 20 |                                                           |     |                                                                                 |             |
| 21 |                                                           | 18b | Plans to promote participant retention and complete follow-up, including list   | ___ n/a ___ |
| 22 |                                                           |     | of any outcome data to be collected for participants who discontinue or         |             |
| 23 |                                                           |     | deviate from intervention protocols                                             |             |
| 24 |                                                           |     |                                                                                 |             |
| 25 | Data                                                      | 19  | Plans for data entry, coding, security, and storage, including any related      | ___ n/a ___ |
| 26 | management                                                |     | processes to promote data quality (eg, double data entry; range checks for      |             |
| 27 |                                                           |     | data values). Reference to where details of data management procedures          |             |
| 28 |                                                           |     | can be found, if not in the protocol                                            |             |
| 29 |                                                           |     |                                                                                 |             |
| 30 |                                                           |     |                                                                                 |             |
| 31 | Statistical                                               | 20a | Statistical methods for analysing primary and secondary outcomes.               | ___ 8-9 ___ |
| 32 | methods                                                   |     | Reference to where other details of the statistical analysis plan can be        |             |
| 33 |                                                           |     | found, if not in the protocol                                                   |             |
| 34 |                                                           |     |                                                                                 |             |
| 35 |                                                           |     |                                                                                 |             |
| 36 |                                                           | 20b | Methods for any additional analyses (eg, subgroup and adjusted analyses)        | ___ 9 ___   |
| 37 |                                                           |     |                                                                                 |             |
| 38 |                                                           | 20c | Definition of analysis population relating to protocol non-adherence (eg, as    | ___ 8-9 ___ |
| 39 |                                                           |     | randomised analysis), and any statistical methods to handle missing data        |             |
| 40 |                                                           |     | (eg, multiple imputation)                                                       |             |
| 41 |                                                           |     |                                                                                 |             |
| 42 |                                                           |     |                                                                                 |             |
| 43 | <b>Methods: Monitoring</b>                                |     |                                                                                 |             |
| 44 |                                                           |     |                                                                                 |             |
| 45 | Data                                                      | 21a | Composition of data monitoring committee (DMC); summary of its role and         | ___ 9 ___   |
| 46 | monitoring                                                |     | reporting structure; statement of whether it is independent from the sponsor    |             |
| 47 |                                                           |     | and competing interests; and reference to where further details about its       |             |
| 48 |                                                           |     | charter can be found, if not in the protocol. Alternatively, an explanation of  |             |
| 49 |                                                           |     | why a DMC is not needed                                                         |             |
| 50 |                                                           |     |                                                                                 |             |
| 51 |                                                           |     |                                                                                 |             |
| 52 |                                                           | 21b | Description of any interim analyses and stopping guidelines, including who      | ___ n/a ___ |
| 53 |                                                           |     | will have access to these interim results and make the final decision to        |             |
| 54 |                                                           |     | terminate the trial                                                             |             |
| 55 |                                                           |     |                                                                                 |             |
| 56 | Harms                                                     | 22  | Plans for collecting, assessing, reporting, and managing solicited and          | ___ n/a ___ |
| 57 |                                                           |     | spontaneously reported adverse events and other unintended effects of trial     |             |
| 58 |                                                           |     | interventions or trial conduct                                                  |             |
| 59 |                                                           |     |                                                                                 |             |
| 60 |                                                           |     |                                                                                 |             |

|    |                                 |     |                                                                                                                                                                                                                                                                                     |              |
|----|---------------------------------|-----|-------------------------------------------------------------------------------------------------------------------------------------------------------------------------------------------------------------------------------------------------------------------------------------|--------------|
| 1  | Auditing                        | 23  | Frequency and procedures for auditing trial conduct, if any, and whether the process will be independent from investigators and the sponsor                                                                                                                                         | ___ 9-10 ___ |
| 2  |                                 |     |                                                                                                                                                                                                                                                                                     |              |
| 3  |                                 |     |                                                                                                                                                                                                                                                                                     |              |
| 4  |                                 |     |                                                                                                                                                                                                                                                                                     |              |
| 5  | <b>Ethics and dissemination</b> |     |                                                                                                                                                                                                                                                                                     |              |
| 6  |                                 |     |                                                                                                                                                                                                                                                                                     |              |
| 7  | Research ethics approval        | 24  | Plans for seeking research ethics committee/institutional review board (REC/IRB) approval                                                                                                                                                                                           | ___ 9 ___    |
| 8  |                                 |     |                                                                                                                                                                                                                                                                                     |              |
| 9  |                                 |     |                                                                                                                                                                                                                                                                                     |              |
| 10 |                                 |     |                                                                                                                                                                                                                                                                                     |              |
| 11 | Protocol amendments             | 25  | Plans for communicating important protocol modifications (eg, changes to eligibility criteria, outcomes, analyses) to relevant parties (eg, investigators, REC/IRBs, trial participants, trial registries, journals, regulators)                                                    | ___ n/a ___  |
| 12 |                                 |     |                                                                                                                                                                                                                                                                                     |              |
| 13 |                                 |     |                                                                                                                                                                                                                                                                                     |              |
| 14 |                                 |     |                                                                                                                                                                                                                                                                                     |              |
| 15 | Consent or assent               | 26a | Who will obtain informed consent or assent from potential trial participants or authorised surrogates, and how (see Item 32)                                                                                                                                                        | ___ 9 ___    |
| 16 |                                 |     |                                                                                                                                                                                                                                                                                     |              |
| 17 |                                 |     |                                                                                                                                                                                                                                                                                     |              |
| 18 |                                 |     |                                                                                                                                                                                                                                                                                     |              |
| 19 |                                 | 26b | Additional consent provisions for collection and use of participant data and biological specimens in ancillary studies, if applicable                                                                                                                                               | ___ 9 ___    |
| 20 |                                 |     |                                                                                                                                                                                                                                                                                     |              |
| 21 |                                 |     |                                                                                                                                                                                                                                                                                     |              |
| 22 | Confidentiality                 | 27  | How personal information about potential and enrolled participants will be collected, shared, and maintained in order to protect confidentiality before, during, and after the trial                                                                                                | ___ n/a ___  |
| 23 |                                 |     |                                                                                                                                                                                                                                                                                     |              |
| 24 |                                 |     |                                                                                                                                                                                                                                                                                     |              |
| 25 |                                 |     |                                                                                                                                                                                                                                                                                     |              |
| 26 | Declaration of interests        | 28  | Financial and other competing interests for principal investigators for the overall trial and each study site                                                                                                                                                                       | ___ 16 ___   |
| 27 |                                 |     |                                                                                                                                                                                                                                                                                     |              |
| 28 |                                 |     |                                                                                                                                                                                                                                                                                     |              |
| 29 |                                 |     |                                                                                                                                                                                                                                                                                     |              |
| 30 | Access to data                  | 29  | Statement of who will have access to the final trial dataset, and disclosure of contractual agreements that limit such access for investigators                                                                                                                                     | ___ 9,16 ___ |
| 31 |                                 |     |                                                                                                                                                                                                                                                                                     |              |
| 32 |                                 |     |                                                                                                                                                                                                                                                                                     |              |
| 33 | Ancillary and post-trial care   | 30  | Provisions, if any, for ancillary and post-trial care, and for compensation to those who suffer harm from trial participation                                                                                                                                                       | ___ n/a ___  |
| 34 |                                 |     |                                                                                                                                                                                                                                                                                     |              |
| 35 |                                 |     |                                                                                                                                                                                                                                                                                     |              |
| 36 | Dissemination policy            | 31a | Plans for investigators and sponsor to communicate trial results to participants, healthcare professionals, the public, and other relevant groups (eg, via publication, reporting in results databases, or other data sharing arrangements), including any publication restrictions | ___ 9 ___    |
| 37 |                                 |     |                                                                                                                                                                                                                                                                                     |              |
| 38 |                                 |     |                                                                                                                                                                                                                                                                                     |              |
| 39 |                                 |     |                                                                                                                                                                                                                                                                                     |              |
| 40 |                                 |     |                                                                                                                                                                                                                                                                                     |              |
| 41 |                                 |     |                                                                                                                                                                                                                                                                                     |              |
| 42 |                                 | 31b | Authorship eligibility guidelines and any intended use of professional writers                                                                                                                                                                                                      | ___ 9,16 ___ |
| 43 |                                 |     |                                                                                                                                                                                                                                                                                     |              |
| 44 |                                 | 31c | Plans, if any, for granting public access to the full protocol, participant-level dataset, and statistical code                                                                                                                                                                     | ___ n/a ___  |
| 45 |                                 |     |                                                                                                                                                                                                                                                                                     |              |
| 46 |                                 |     |                                                                                                                                                                                                                                                                                     |              |
| 47 |                                 |     |                                                                                                                                                                                                                                                                                     |              |
| 48 | <b>Appendices</b>               |     |                                                                                                                                                                                                                                                                                     |              |
| 49 |                                 |     |                                                                                                                                                                                                                                                                                     |              |
| 50 | Informed consent materials      | 32  | Model consent form and other related documentation given to participants and authorised surrogates                                                                                                                                                                                  | ___ 9 ___    |
| 51 |                                 |     |                                                                                                                                                                                                                                                                                     |              |
| 52 |                                 |     |                                                                                                                                                                                                                                                                                     |              |
| 53 |                                 |     |                                                                                                                                                                                                                                                                                     |              |
| 54 | Biological specimens            | 33  | Plans for collection, laboratory evaluation, and storage of biological specimens for genetic or molecular analysis in the current trial and for future use in ancillary studies, if applicable                                                                                      | ___ n/a ___  |
| 55 |                                 |     |                                                                                                                                                                                                                                                                                     |              |
| 56 |                                 |     |                                                                                                                                                                                                                                                                                     |              |
| 57 |                                 |     |                                                                                                                                                                                                                                                                                     |              |

\*It is strongly recommended that this checklist be read in conjunction with the SPIRIT 2013 Explanation & Elaboration for important clarification on the items. Amendments to the protocol should be tracked and dated.



The SPIRIT checklist is copyrighted by the SPIRIT Group under the Creative Commons  
"Attribution-NonCommercial-NoDerivs 3.0 Unported" license.

1  
2  
3  
4  
5  
6  
7  
8  
9  
10  
11  
12  
13  
14  
15  
16  
17  
18  
19  
20  
21  
22  
23  
24  
25  
26  
27  
28  
29  
30  
31  
32  
33  
34  
35  
36  
37  
38  
39  
40  
41  
42  
43  
44  
45  
46  
47  
48  
49  
50  
51  
52  
53  
54  
55  
56  
57  
58  
59  
60

For peer review only
